# Supplementary material for: Divergence of Arctic shrub growth associated with sea ice decline
Source: PubMed Central journal article supplement (PMC7776857; doi:10.1073/pnas.2013311117), 2020-12-14
Supplement: pnas.2013311117.sapp.pdf [file pnas.2013311117.sapp.pdf]

Supplementary Information for:

## Divergence of Arctic shrub growth associated with sea ice decline

Agata Buchwal<sup>a,b,1</sup>, Patrick F. Sullivan<sup>c</sup>, Marc Macias-Fauria<sup>d</sup>, Eric Post<sup>e</sup>, Isla Myers-Smith<sup>f</sup>, Julienne C. Stroeve<sup>g</sup>, Daan Blok<sup>h</sup>, Ken D. Tape<sup>i</sup>, Bruce C. Forbes<sup>j</sup>, Pascale Ropars<sup>k,l</sup>, Esther Lévesque<sup>m</sup>, Bo Elberling<sup>n</sup>, Sandra Angers-Blondin<sup>f</sup>, Joseph S. Boyle<sup>f</sup>, Stéphane Boudreau<sup>o</sup>, Noémie Boulanger-Lapointe<sup>p</sup>, Cassandra Gamm<sup>c</sup>, Martin Hallinger<sup>q</sup>, Grzegorz Rachlewicz<sup>a,f</sup>, Amanda Young<sup>s,t</sup>, Pentti Zetterberg<sup>u</sup>, and Jeffrey M. Welker<sup>v,b</sup>

<sup>a</sup>Institute of Geoecology and Geoinformation, Adam Mickiewicz University, B. Krygowskiego 10, 61-680 Poznan, Poland; <sup>b</sup>Department of Biological Sciences, University of Alaska Anchorage, 3151 Alumni Loop, 99508 Anchorage, Alaska, USA; <sup>c</sup>Environment and Natural Resources Institute, University of Alaska Anchorage, Anchorage, AK, USA; <sup>d</sup>School of Geography and the Environment, University of Oxford, OX1 3QY Oxford, UK; <sup>e</sup>Department of Wildlife, Fish, and Conservation Biology, University of California, Davis, 95616 USA; <sup>f</sup>School of GeoSciences, University of Edinburgh, EH9 3FF Edinburgh, UK; <sup>g</sup>University of Manitoba, Winnipeg and the National Snow and Ice Data Center, Cooperative Institute for Research in Environmental Sciences, University of Colorado at Boulder, Boulder, Colorado, USA; <sup>h</sup>Dutch Research Council (NWO), The Hague, 93460, The Netherlands; <sup>i</sup>Geophysical Institute, 2156 N Koyukuk Drive, University of Alaska Fairbanks, 99775 Fairbanks, Alaska, USA; <sup>j</sup>Arctic Centre, University of Lapland, Box 122, FI-96101 Rovaniemi, Finland; <sup>k</sup>Chaire de recherche du Canada en biodiversité nordique, Université du Québec à Rimouski, QC, G5L 3A1, Canada; <sup>l</sup>Centre for Indigenous Peoples' Nutrition and Environment, McGill University, QC, H9X 3V9, Canada; <sup>m</sup>Département des Sciences de l'environnement et Centre d'études nordiques, Université du Québec à Trois-Rivières, QC, G8Z 4M3, Canada; <sup>n</sup>Center for Permafrost (CENPERM), Department of Geoscience and Natural Resource Management, University of Copenhagen, Copenhagen, Øster Voldgade 10, DK-1350 Copenhagen, Denmark; <sup>o</sup>Département de biologie et Centre d'études nordiques, Université Laval, 1045 Avenue de la Médecine, G1V 0A6 Québec, Canada; <sup>p</sup>Department of Geography, University of British Columbia, 1984 West Mall, V6T 1Z2 Vancouver, BC, Canada; <sup>q</sup>Biology Department, Swedish Agricultural University (SLU), SE-750 07 Uppsala, Sweden; <sup>r</sup>Department of Health and Environmental Science, Xi'an Jiaotong-Liverpool University, Ren'ai Road 111, 215123 Suzhou, China; <sup>s</sup>Toolik Field Station, Institute of Arctic Biology, University of Alaska Fairbanks, USA; <sup>t</sup>Department of Geography, Pennsylvania State University, USA; <sup>u</sup>Laboratory of Dendrochronology, School of Forest Sciences, University of Eastern Finland, Joensuu, Finland; <sup>v</sup>Department of Ecology & Genetics, University of Oulu and UArctic, Oulu, Finland

Corresponding author: Agata Buchwal  
Email: [kamzik@amu.edu.pl](mailto:kamzik@amu.edu.pl)

**This PDF file includes:**

Figures S1 to S11

Tables S1 to S14  
SI References

**Other supplementary materials for this manuscript include the following:**

All individual shrub ring data are available from the Dryad Digital Repository:  
<https://doi.org/10.5061/dryad.kh1893248>  
(Buchwal et al. 2020), Deposited date: November 24, 2020.

Buchwal, Agata et al. (2020), Data from: Divergence of Arctic shrub growth associated with sea ice decline, Dryad, Dataset, <https://doi.org/10.5061/dryad.kh1893248>

Datasets S1 (Example R code used for the analyses)

## Supplementary Figures

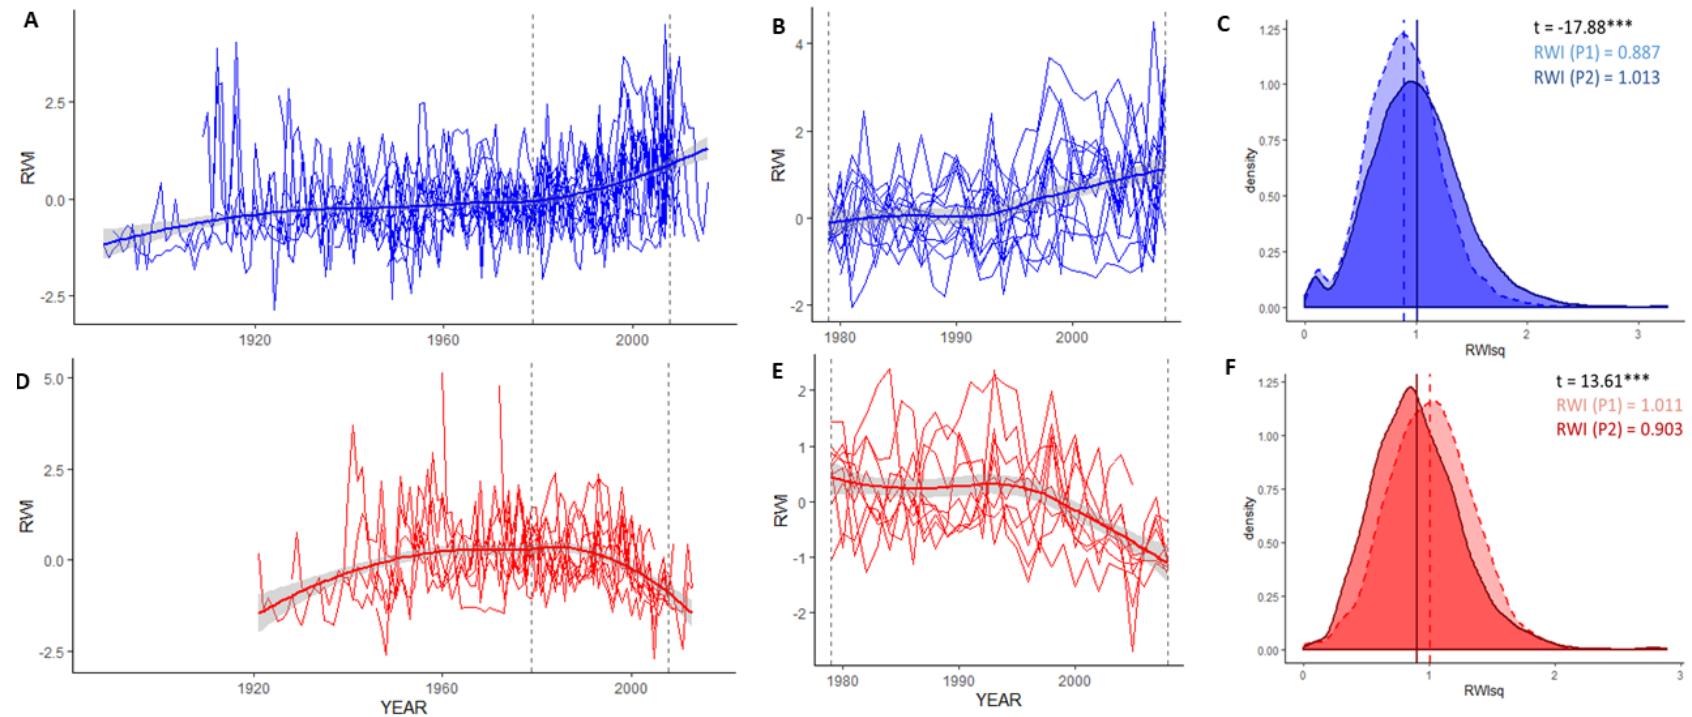

**Fig. S1. Overview of *increasers* (A, B) and *decreasers* (D, E) standardized (dRCS) shrub chronologies analyzed in the synthesis together with changes in mean RWI for all *increasers* (C) and *decreasers* (F) shrubs.** Overview of entire chronologies timespan (A, C), together with study period 1979-2008 (B, E) indicated by vertical dashed lines; *increasers* (blue lines) = 13 chronologies (363 shrubs); *decreasers* (red lines) = 9 chronologies (251 shrubs). Smoothed conditional means with 95% confidence intervals are marked for each responder group. Mean correlation between chronologies (1979-2008) equaled 0.108 and 0.4 for *increasers* and *decreasers*, respectively. Changes in mean RWI (C, F) between early (P1=1980-1993; dashed lines and lighter colors) and recent (P2=1994-2008; solid lines and darker colors) period for all shrubs analyzed for (C) *increasers* (n=11,239 annual growth records, with 43% and 57% shrubs assigned to early and recent period respectively) and (F) *decreasers* (n=7,822 annual growth records, with 42% and 58% shrubs assigned to early and recent period respectively). RWIsq - ring-width index after transformation (square-root). Results of Welch two sample t-test, together with mean RWI for each period, are presented for each responder group in the top right. \*\*\*  $P < 0.001$

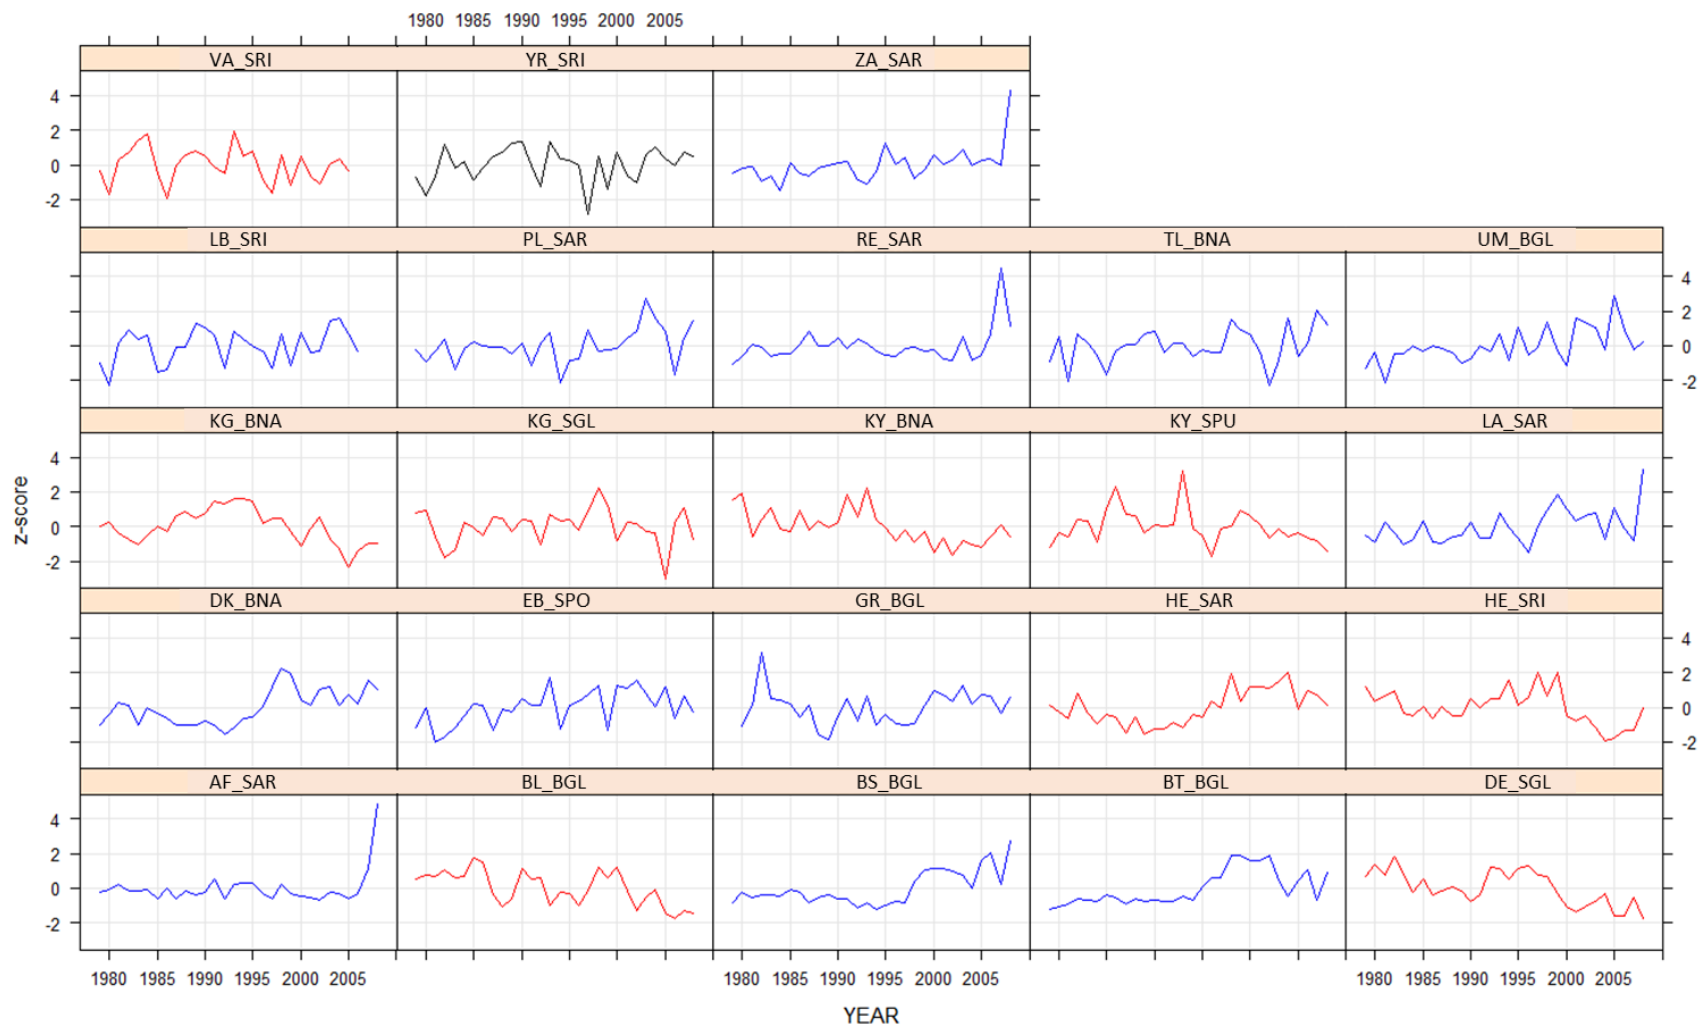

**Fig. S2. Overview of 23 raw shrub ring chronologies (scaled for comparison) used in SIE-shrub growth relationship analyses for common period (1979-2008).** Blue curves - *increasers*; red curves - *decreasers*; black curve - *neutral* chronology. For full site names and descriptive statistics for each chronology see Table S1

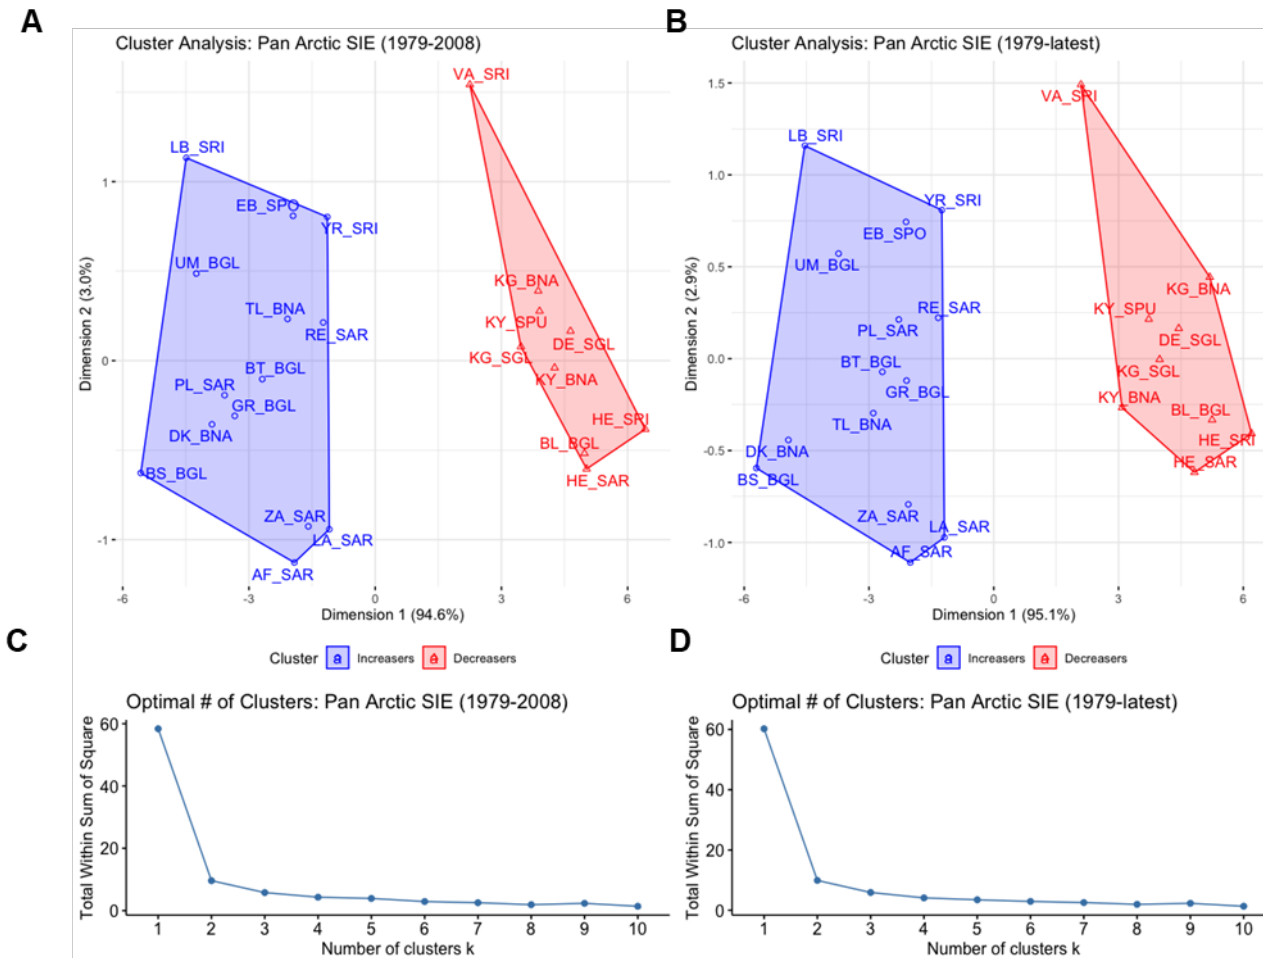

**Fig. S3. Principal components analysis of the results of a *k*-means cluster analysis designed to group shrub radial growth responses to variation in monthly Pan-Arctic sea ice extent (SIE, 23 shrub-ring chronologies, dRCS detrending).** Correlations coefficients for each chronology were obtained using monthly Pan-Arctic SIE (from previous June to current August) for (a, c) common period (1979-2008; Table S5) and (b, d) entire chronology timespan (Table S6). Blue color - *increasers*; red color - *decreaseers*. Analysis of the optimal number of groups (c, d) showed strong support for just two major groups of responders. Thus, the YR chronology, which was identified as a *neutral* responder, because it was not significantly correlated with SIE during any months, was identified as a marginal increaser in this analysis. The YR chronology was excluded from subsequent analyses. For full chronology names see Table S1.

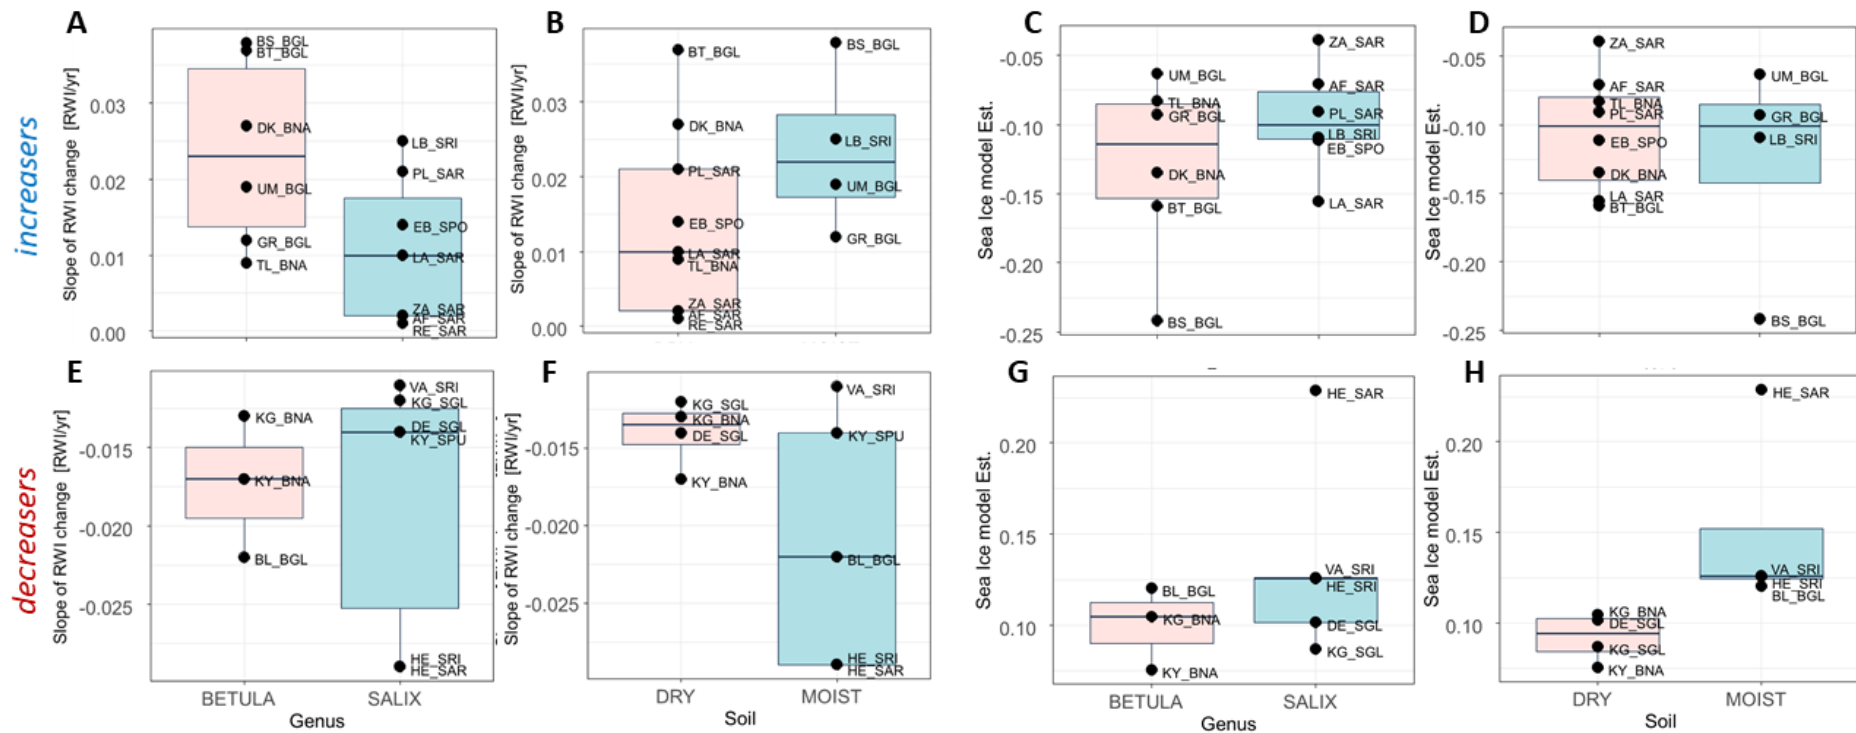

**Fig. S4. Variation in mean standardized radial growth (RWI - ring width index, 1979-2008) changes together with variation in coefficient estimates for the best sea ice model (1980-2008) obtained for *increasers* (A-D) and *decreasers* (E-H) chronologies.** Results are shown with distinction between Betula and Salix chronologies (A, C, E, G), and dry and moist soil types (B, D, F, H). Model estimates for the best sea ice model were obtained from linear mixed effect models using all shrubs (instead of chronologies, Table S13) with a random intercept for a year. See Table S1 for full chronology names.

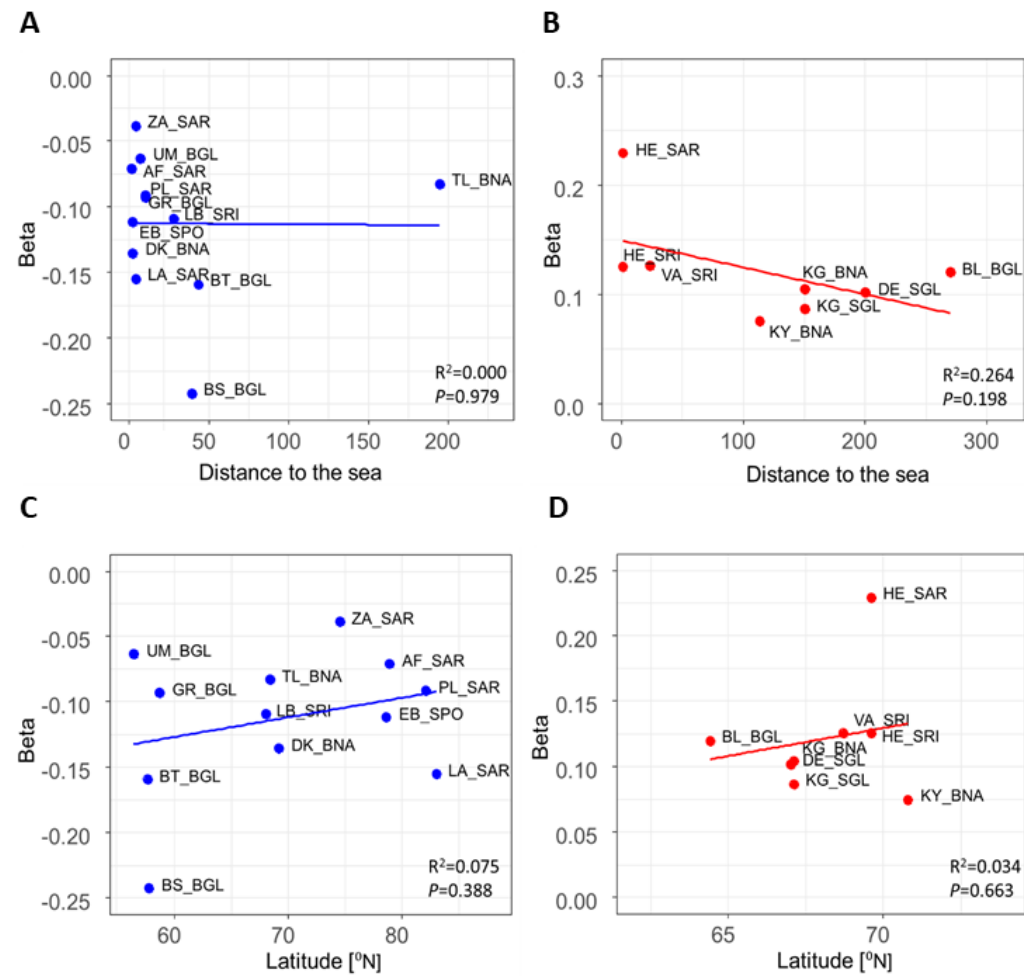

**Fig. S5. Variation in coefficient estimates for the best sea ice model (Beta) obtained for each *increaser* (A, C) and *deceiver* (B, D) chronology (1979-2008) in relation to distance from the open sea (A, B) and latitude (C, D). Model estimates were obtained from linear mixed effect models using all shrubs (instead of chronologies, Table S13) with a random intercept for a year. See Table S1 for full chronology names.**



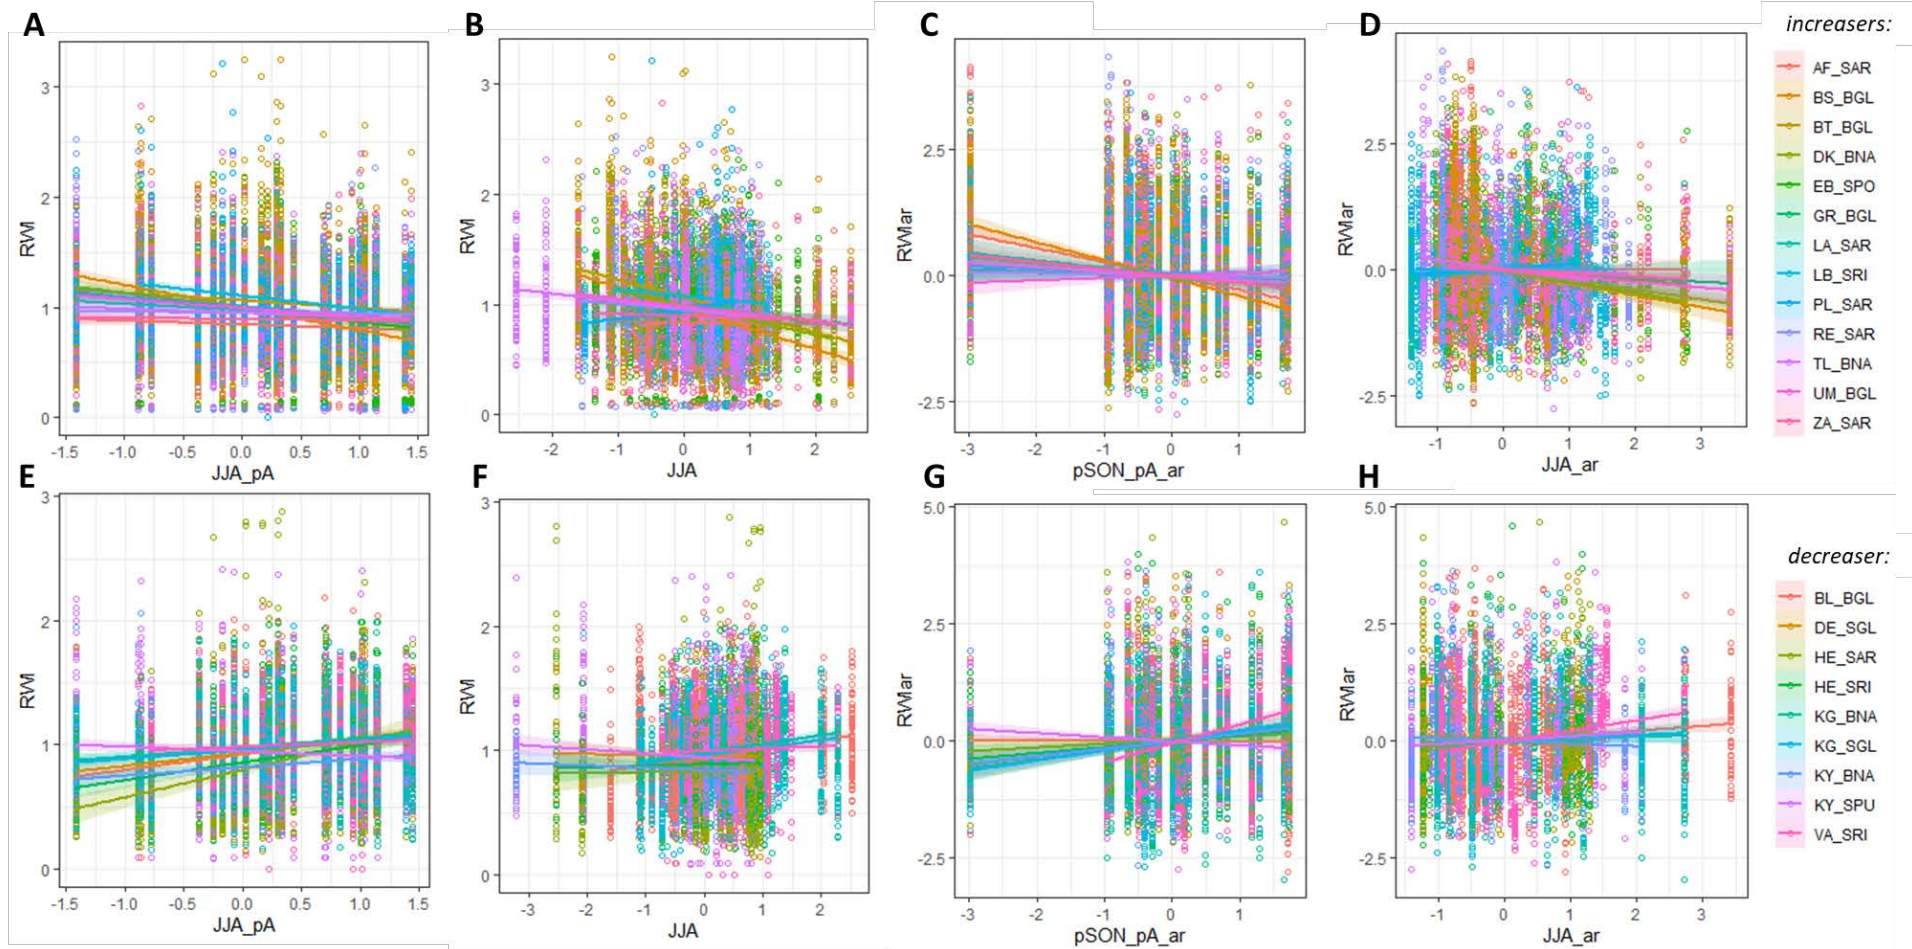

**Fig. S6. Relationships between *increasers* (A-D) and *decreasers* (E-H) all shrubs annual radial growth (1980-2008, grouped by chronology) and selected sea ice variables: (A, E) mean Pan-Arctic sea ice extent (SIE) for June to August (JJA) period; (B, F) mean regional JJA SIE; (C, G) mean previous autumn SIE detrended; (D, H) mean regional JJA SIE detrended. RWI - ring width indices after square root transformation and diameter RCS detrending; RWIar - ring width indices after AR detrending. All predictors were standardized (z-score). For full model statistics (at the responder group level) please refer to Table S12 (raw sea ice data) and Table S14 (AR detrended shrub and sea ice data).**



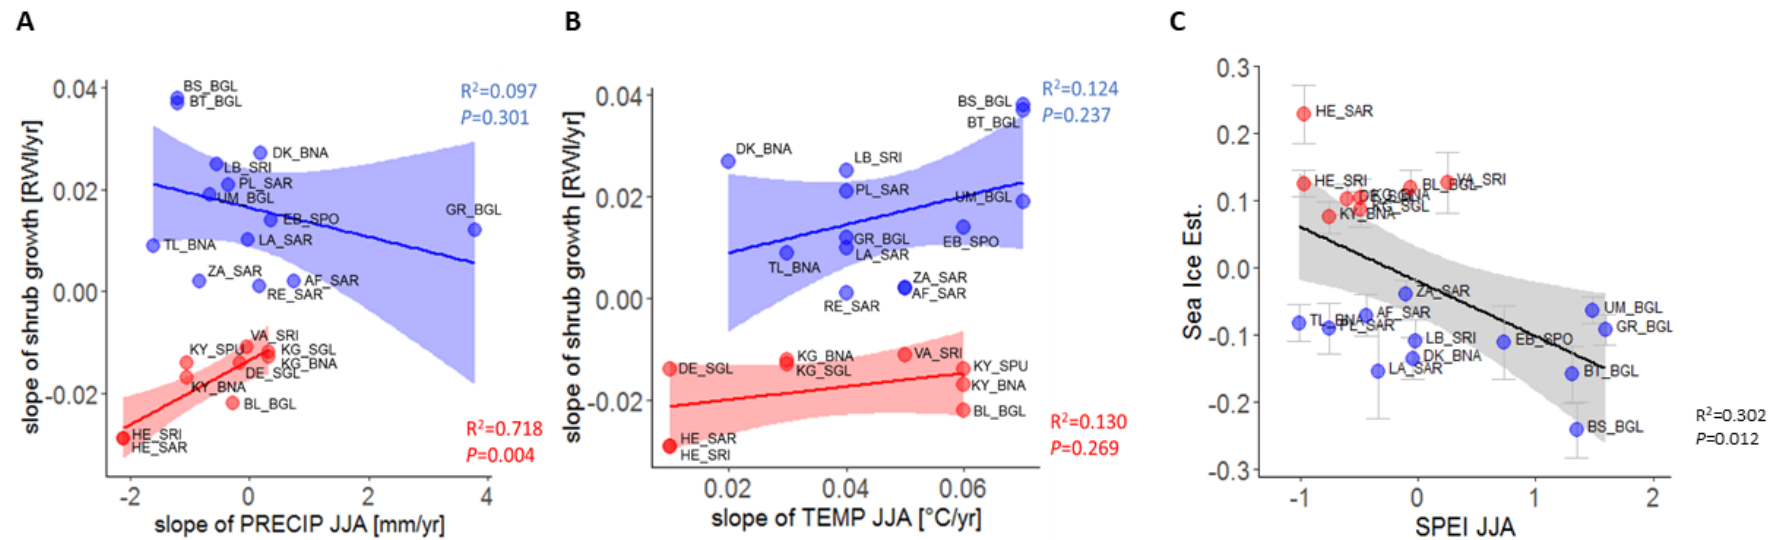

**Fig. S7. (A) Relationship between slopes of shrub radial growth and slopes of June to August precipitation, and (B) June to August temperature for each *increaser* (blue points) and *decreaser* (red points) chronology (1979-2008). (C) Relationship between coefficient estimates (with associated standard errors) for the best sea ice model (Sea Ice Est.) and mean June to August SPEI obtained for each *increaser* (blue points) and *decreaser* (red points) chronology (1979-2008). Sea Ice model estimates at a site level were obtained from linear mixed effect models using all shrubs (instead of chronologies) with a random intercept for a year (Table S13).**

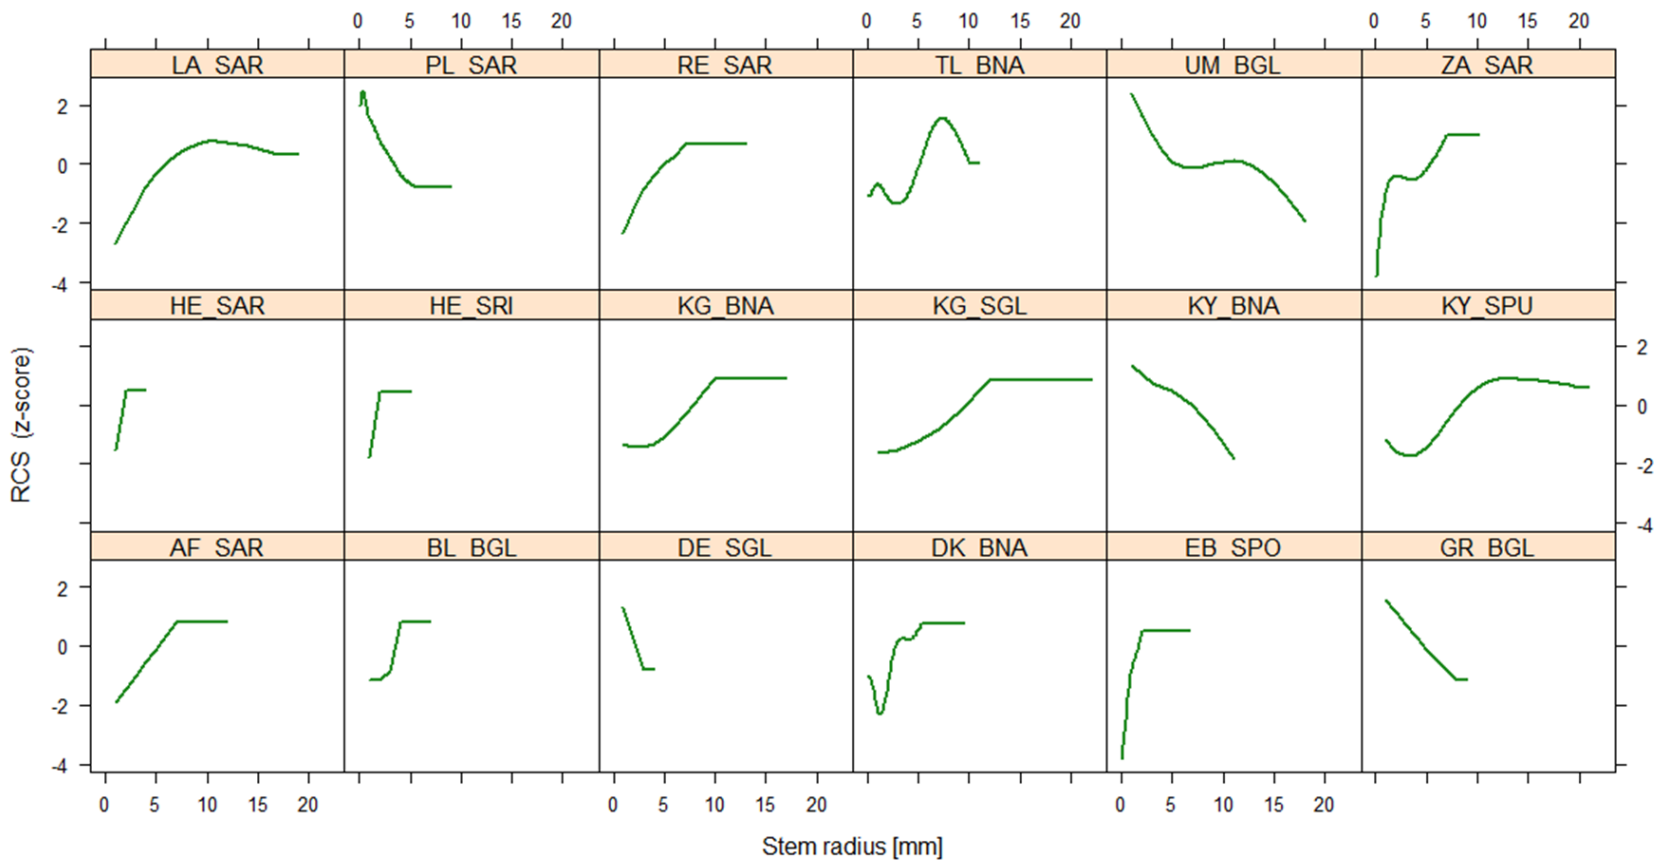

**Fig. S8. Relationship between mean ring-widths and shrub stem radius.** Relationship between mean ring-widths (Y axis, scaled for comparison) and shrub stem radius (X axis) for shrub ring chronologies used the synthesis with the stem radius up to 20 mm. Relationship is presented using smoothed detrending curve (RCS, diameter based) calculated for each chronology using all shrubs. For full site names see Table S1.

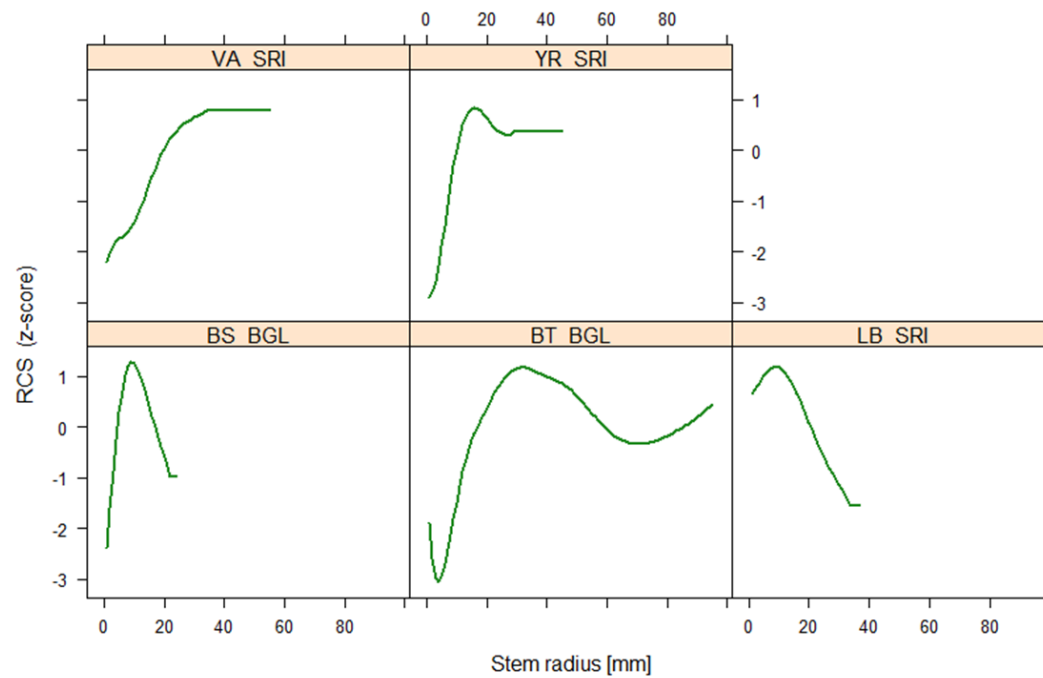

**Fig. S9. Relationship between mean ring-widths and shrub stem radius.** Relationship between mean ring-widths (Y axis, scaled for comparison) and shrub stem radius (X axis) for shrub ring chronologies used the synthesis with the stem radius greater than 20 mm. Relationship is presented using smoothed detrending curve (RCS, diameter based) calculated for each chronology using all shrubs. For full site names see Table S1.

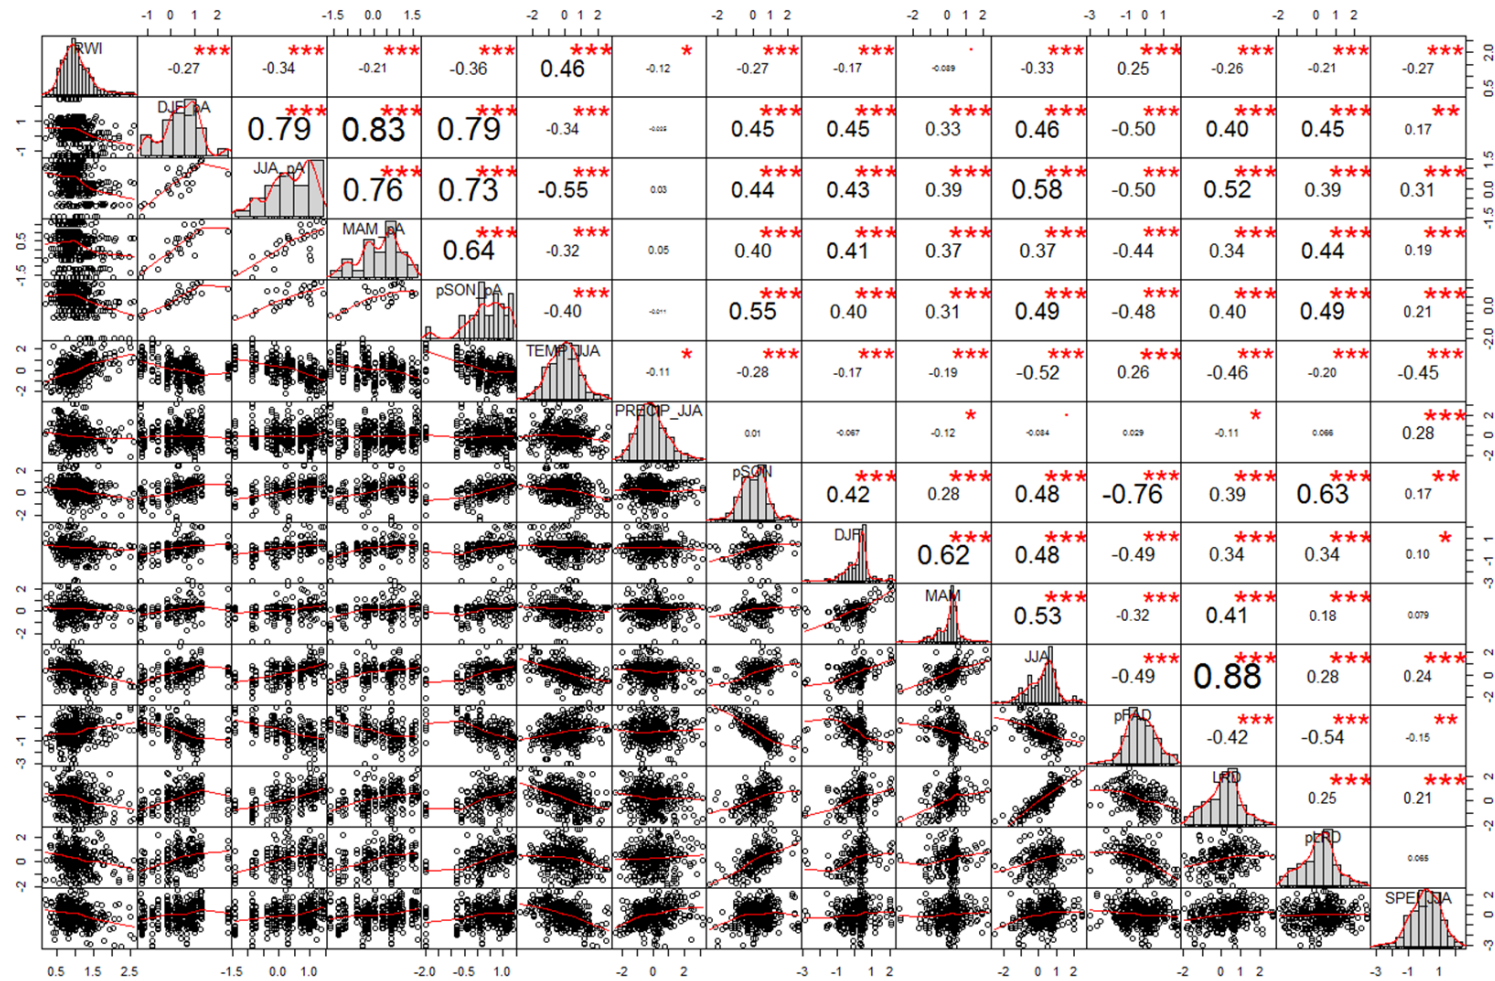

**Fig. S10. Correlation matrix for response variable (RWI, i.e., mean annual ring width index for 13 *increaser's* chronologies, n=390 annual records, period 1979-2008) and predictor variables used in SEM. All predictors were standardized using z-score. For full name of predictors see Table S9. On the upper right corner Pearson's correlation coefficients between all variables are visualized with the significance level denoted with asterisks (i.e., \* $p < 0.05$ , \*\* $p < 0.01$ , \*\*\* $p < 0.001$ ). On the bottom left corner bivariate scatterplots with fitted lines are presented.**

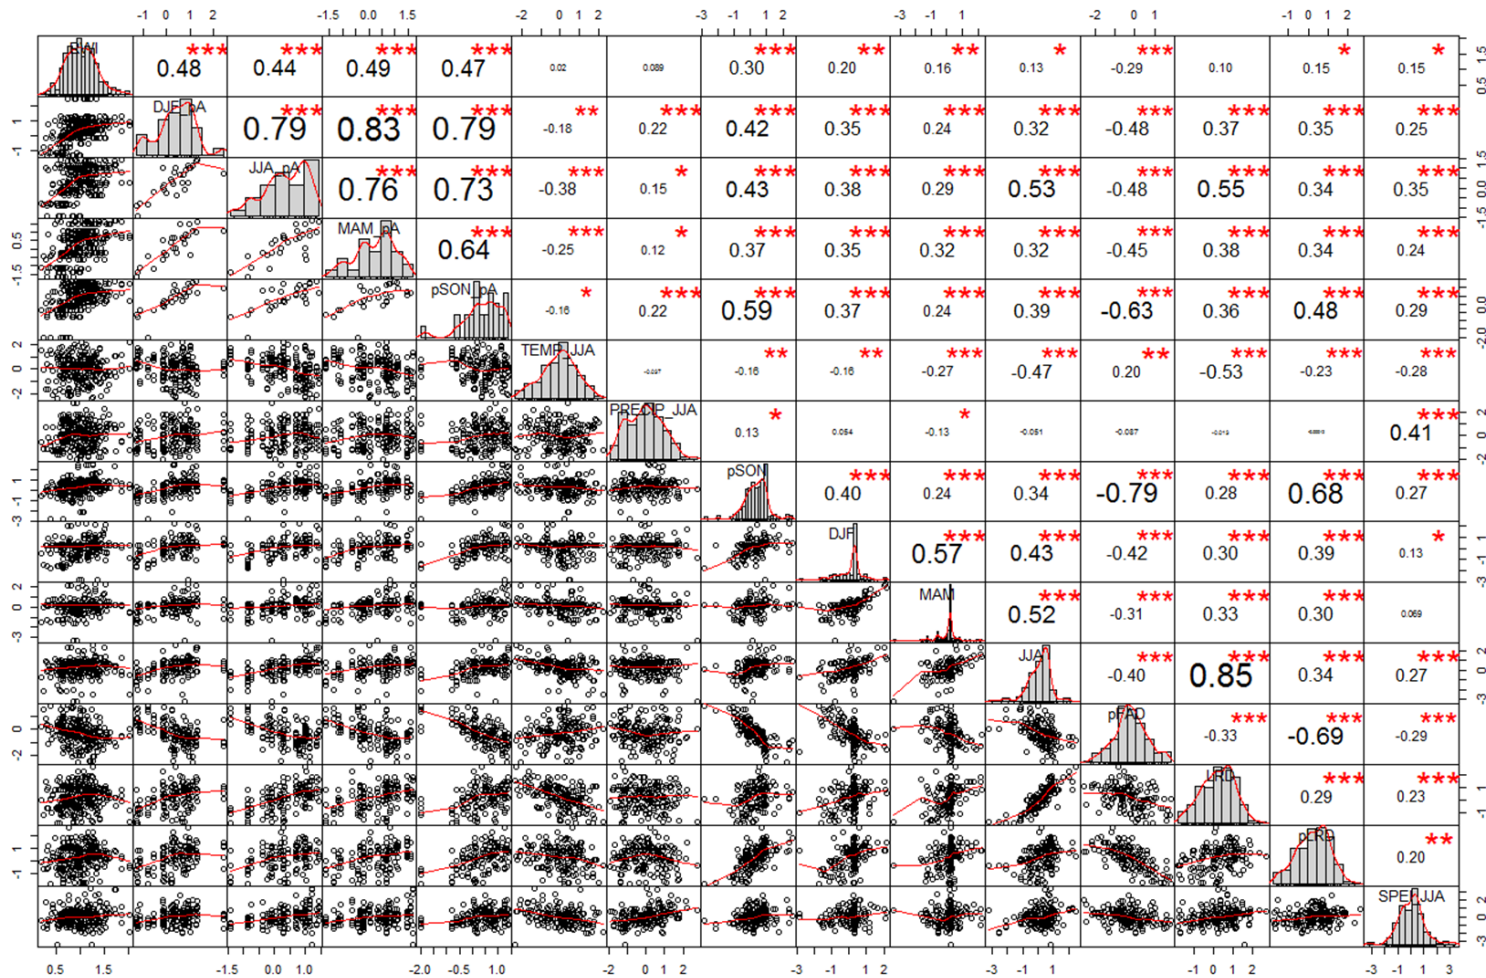

**Fig. S11. Correlation matrix for response variable (RWI, i.e., mean annual ring width index for nine *decreaser's* chronologies,  $n=270$  annual records, period 1979-2008) and predictor variables used in SEM. All predictors were standardized using z-score. For full name of predictors see Table S9. On the upper right corner Pearson's correlation coefficients between all variables are visualized with the significance level denoted with asterisks (i.e., \*  $p < 0.05$ , \*\*  $p < 0.01$ , \*\*\*  $p < 0.001$ ). On the bottom left corner bivariate scatterplots with fitted lines are presented.**

## Supplementary Tables

**Table S1. Characteristics of shrub chronologies included in the synthesis with responder type indication** (blue font - *increaser*; red font - *decreaser*; black bold font - *neutral*). YR site, as a neutral responder, was not included in the final analyses. Types of soil moisture classes (D - dry; M - moist, W - wet) for each site were assessed after Myers-Smith et al. (2015) (3), with moist and wet classes pooled into moist soil type. Sampling design after Sullivan & Csank (2016) (11): SEL- selective; DOM - dominant; STR - stratified; RAN - random. Shrubs' sectioning method types: SS - serial sectioning; S - stem only; LS - largest stem; RC - root collar only. Descriptive statistics are presented for the study periods (1979-2008). MRW - mean ring width; sd - standard deviation; MS - mean sensitivity; AR(1) - first-order autocorrelation; rbar.tot - mean pairwise correlation between all cross-sections; EPS - expressed population signal.





**Table S2. List of shrub chronologies included in the synthesis together with the geographical coordinates and regional sea ice province assigned.** Mean day of the year (DOY) for the first advanced day (FAD) and the last retreat day (LRD) together with 95% confidence intervals was calculated after Stroeve et al. (2016) (12).

| Chronology ID | Responder        | Site name                       | Species                   | Latitude (N) | Longitude (E/-W) | REGIONAL SEA ICE province used: | mean DOY of FAD (95% CI) | mean DOY of LRD (95% CI) |
|---------------|------------------|---------------------------------|---------------------------|--------------|------------------|---------------------------------|--------------------------|--------------------------|
| AF_SAR        | <i>increaser</i> | Alexandra Fiord                 | <i>Salix arctica</i>      | 78.9         | -75.9            | Baffin Sea                      | 317 (314-321)            | 182 (179-185)            |
| BL_BGL        | <i>decreaser</i> | Baker Lake                      | <i>Betula glandulosa</i>  | 64.4         | -95.9            | Hudson Bay                      | 335 (332-338)            | 176 (173-179)            |
| BS_BGL        | <i>increaser</i> | Boniface River research station | <i>Betula glandulosa</i>  | 57.8         | -76.2            | Hudson Bay                      | 335 (332-338)            | 176 (173-179)            |
| BT_BGL        | <i>increaser</i> | Boniface River research station | <i>Betula glandulosa</i>  | 57.7         | -76.1            | Hudson Bay                      | 335 (332-338)            | 176 (173-179)            |
| DE_SGL        | <i>decreaser</i> | Dempster                        | <i>Salix glauca</i>       | 67.0         | -136.2           | Beaufort Sea                    | 293 (289-298)            | 189 (182-195)            |
| DK_BNA        | <i>increaser</i> | Disko Island                    | <i>Betula nana</i>        | 69.2         | -53.3            | Baffin Sea                      | 317 (314-321)            | 182 (179-185)            |
| EB_SPO        | <i>increaser</i> | Ebbadalen                       | <i>Salix polaris</i>      | 78.6         | 16.5             | Greenland Sea                   | 324 (318-331)            | 181 (177-186)            |
| GR_BGL        | <i>increaser</i> | Kangiqualuq (George River)      | <i>Betula glandulosa</i>  | 58.7         | -65.9            | Hudson Bay                      | 335 (332-338)            | 176 (173-179)            |
| HE_SRI        | <i>decreaser</i> | Herschel Island                 | <i>Salix richardsonii</i> | 69.6         | -138.9           | Beaufort Sea                    | 293 (289-298)            | 189 (182-195)            |
| HE_SAR        | <i>decreaser</i> | Herschel Island                 | <i>Salix arctica</i>      | 69.6         | -138.9           | Beaufort Sea                    | 293 (289-298)            | 189 (182-195)            |
| KG_BNA        | <i>decreaser</i> | Kangerlussuaq                   | <i>Betula nana</i>        | 67.1         | -50.3            | Baffin Sea                      | 317 (314-321)            | 182 (179-185)            |
| KG_SGL        | <i>decreaser</i> | Kangerlussuaq                   | <i>Salix glauca</i>       | 67.1         | -50.3            | Baffin Sea                      | 317 (314-321)            | 182 (179-185)            |
| KY_SPU        | <i>decreaser</i> | Kytalyk Reserve                 | <i>Salix pulchra</i>      | 70.8         | 147.5            | East Siberian                   | 286 (282-291)            | 201 (197-206)            |
| KY_BNA        | <i>decreaser</i> | Kytalyk Reserve                 | <i>Betula nana</i>        | 70.8         | 147.5            | East Siberian                   | 286 (282-291)            | 201 (197-206)            |
| LA_SAR        | <i>increaser</i> | Lake A                          | <i>Salix arctica</i>      | 83.0         | -75.4            | Central Arctic                  | 334 (317-352)            | 206 (190-223)            |
| LB_SRI        | <i>increaser</i> | Laborovaya                      | <i>Salix lanata</i>       | 68.0         | 68.0             | Kara Sea                        | 313 (308-318)            | 189 (185-194)            |
| PL_SAR        | <i>increaser</i> | Peary Land                      | <i>Salix arctica</i>      | 82.1         | -33.0            | Central Arctic                  | 334 (317-352)            | 206 (190-223)            |
| RE_SAR        | <i>increaser</i> | Resolute                        | <i>Salix arctica</i>      | 74.7         | -94.9            | Canadian Archipelago            | 293 (291-296)            | 192 (189-196)            |
| TL_BNA        | <i>increaser</i> | Toolik Lake                     | <i>Betula nana</i>        | 68.4         | -149.9           | Beaufort Sea                    | 293 (289-298)            | 189 (182-195)            |
| UM_BGL        | <i>increaser</i> | Umiujuaq                        | <i>Betula glandulosa</i>  | 56.5         | -76.4            | Hudson Bay                      | 335 (332-338)            | 176 (173-179)            |
| VA_SRI        | <i>decreaser</i> | Varandei                        | <i>Salix lanata</i>       | 68.7         | 58.5             | Barents Sea                     | 342 (335-348)            | 159 (153-164)            |
| ZA_SAR        | <i>increaser</i> | Zackenberq                      | <i>Salix arctica</i>      | 74.5         | -20.5            | Greenland Sea                   | 324 (318-331)            | 181 (177-186)            |

**Table S3. Mean standardized ring width index (RWI) for early (1979-1993) and recent (1994-2008) period for each chronology.**  $\Delta$  RWI represents difference between early and recent period. P-value from the Welch two sample t-test is reported. Values marked in bold indicate a statistically significant difference ( $p < 0.05$ ).

| Responder        | Chronology ID | Site name                      | Species                   | mean RWI    |             | $\Delta$ RWI | P-value      |
|------------------|---------------|--------------------------------|---------------------------|-------------|-------------|--------------|--------------|
|                  |               |                                |                           | (1979-1993) | (1994-2008) |              |              |
| <i>increaser</i> | AF_SAR        | Alexandra Fiord                | <i>Salix arctica</i>      | 0.80        | 0.79        | 0.00         | 0.967        |
| <i>increaser</i> | BS_BGL        | Boniface River                 | <i>Betula glandulosa</i>  | 0.74        | 1.29        | <b>0.55</b>  | <b>0.004</b> |
| <i>increaser</i> | BT_BGL        | Boniface River                 | <i>Betula glandulosa</i>  | 0.81        | 1.60        | <b>0.79</b>  | <b>0.000</b> |
| <i>increaser</i> | DK_BNA        | Disko Island                   | <i>Betula nana</i>        | 0.73        | 1.33        | <b>0.60</b>  | <b>0.000</b> |
| <i>increaser</i> | EB_SPO        | Ebbadalen                      | <i>Salix polaris</i>      | 0.97        | 1.11        | 0.14         | 0.322        |
| <i>increaser</i> | GR_BGL        | Kangiqsualujuaq (George River) | <i>Betula glandulosa</i>  | 0.91        | 1.04        | 0.13         | 0.165        |
| <i>increaser</i> | LA_SAR        | Lake A                         | <i>Salix arctica</i>      | 0.99        | 1.11        | 0.13         | 0.434        |
| <i>increaser</i> | LB_SRI        | Laborovaya                     | <i>Salix lanata</i>       | 1.04        | 1.34        | <b>0.29</b>  | <b>0.020</b> |
| <i>increaser</i> | PL_SAR        | Peary Land                     | <i>Salix arctica</i>      | 0.95        | 1.18        | 0.23         | 0.088        |
| <i>increaser</i> | RE_SAR        | Resolute                       | <i>Salix arctica</i>      | 1.13        | 1.02        | -0.12        | 0.357        |
| <i>increaser</i> | TL_BNA        | Toolik Lake                    | <i>Betula nana</i>        | 0.97        | 1.03        | 0.06         | 0.555        |
| <i>increaser</i> | UM_BGL        | Umiujuaq                       | <i>Betula glandulosa</i>  | 0.90        | 1.18        | <b>0.28</b>  | <b>0.003</b> |
| <i>increaser</i> | ZA_SAR        | Zackenbergl                    | <i>Salix arctica</i>      | 0.88        | 0.93        | 0.05         | 0.563        |
|                  |               | mean                           |                           | 0.91        | 1.15        | <b>0.24</b>  | <b>0.000</b> |
| <i>decreaser</i> | BL_BGL        | Baker Lake                     | <i>Betula glandulosa</i>  | 1.20        | 0.91        | <b>-0.30</b> | <b>0.006</b> |
| <i>decreaser</i> | DE_SGL        | Dempster                       | <i>Salix glauca</i>       | 1.09        | 0.94        | -0.15        | 0.074        |
| <i>decreaser</i> | HE_SAR        | Herschel Island                | <i>Salix arctica</i>      | 1.14        | 0.97        | -0.17        | 0.328        |
| <i>decreaser</i> | HE_SRI        | Herschel Island                | <i>Salix richardsonii</i> | 1.18        | 0.80        | <b>-0.38</b> | <b>0.000</b> |
| <i>decreaser</i> | KG_BNA        | Kangerlussuaq                  | <i>Betula nana</i>        | 1.16        | 0.95        | <b>-0.21</b> | <b>0.036</b> |
| <i>decreaser</i> | KG_SGL        | Kangerlussuaq                  | <i>Salix glauca</i>       | 1.07        | 0.94        | -0.13        | 0.198        |
| <i>decreaser</i> | KY_BNA        | Kytalyk Reserve                | <i>Betula nana</i>        | 0.97        | 0.64        | <b>-0.33</b> | <b>0.000</b> |
| <i>decreaser</i> | KY_SPU        | Kytalyk Reserve                | <i>Salix pulchra</i>      | 1.05        | 0.70        | <b>-0.35</b> | <b>0.007</b> |
| <i>decreaser</i> | VA_SRI        | Varandei                       | <i>Salix lanata</i>       | 1.21        | 0.98        | -0.23        | 0.136        |
|                  |               | mean                           |                           | 1.12        | 0.87        | <b>-0.25</b> | <b>0.000</b> |

**Table S4. Changes in mean summer (June-July-August) temperature, precipitation and SPEI for each study site for the study period (1979-2008), as well for early (1979-1993) and recent (1994-2008) period calculated using linear regression. Values marked in bold indicate a statistically significant changes in analyzed climatic parameters ( $p < 0.05$ ). Climatic data sources: see Table S9.**

| Responder        | Site ID | TEMP JJA    |             |             |             |              |              | PRECIP JJA  |             |             |              |              |              | SPEI JJA    |             |             |               |              |              |
|------------------|---------|-------------|-------------|-------------|-------------|--------------|--------------|-------------|-------------|-------------|--------------|--------------|--------------|-------------|-------------|-------------|---------------|--------------|--------------|
|                  |         | (1979-2008) | (1979-1993) | (1994-2008) | (1979-2008) |              |              | (1979-2008) | (1979-1993) | (1994-2008) | (1979-2008)  |              |              | (1979-2008) | (1979-1993) | (1994-2008) | (1979-2008)   |              |              |
|                  |         | [°C]        | [°C]        | [°C]        | $\beta$     | p-value      | R2           | [mm]        | [mm]        | [mm]        | $\beta$      | p-value      | R2           |             |             |             | $\beta$       | p-value      | R2           |
| <i>increaser</i> | AF      | 0.8         | 0.5         | 1.0         | <b>0.05</b> | <b>0.006</b> | <b>0.237</b> | 77          | 70          | 85          | 0.74         | 0.323        | 0.035        | -0.443      | -0.283      | -0.596      | <b>-0.026</b> | <b>0.008</b> | <b>0.227</b> |
| <i>increaser</i> | BS      | 8.1         | 7.5         | 8.7         | <b>0.07</b> | <b>0.001</b> | <b>0.321</b> | 185         | 192         | 177         | -1.20        | 0.266        | 0.044        | 1.353       | 1.406       | 1.286       | -0.006        | 0.360        | 0.030        |
| <i>increaser</i> | BT      | 8.1         | 7.5         | 8.7         | <b>0.07</b> | <b>0.001</b> | <b>0.321</b> | 185         | 192         | 177         | -1.20        | 0.266        | 0.044        | 1.315       | 1.406       | 1.286       | 0.001         | 0.881        | 0.001        |
| <i>increaser</i> | DK      | 4.4         | 4.3         | 4.6         | 0.02        | 0.120        | 0.084        | 92          | 92          | 91          | 0.18         | 0.745        | 0.004        | -0.048      | 0.010       | -0.105      | -0.001        | 0.869        | 0.001        |
| <i>increaser</i> | EB      | 2.6         | 2.2         | 2.9         | <b>0.06</b> | <b>0.000</b> | <b>0.487</b> | 100         | 93          | 107         | 0.35         | 0.543        | 0.013        | 0.732       | 0.971       | 0.510       | <b>-0.029</b> | <b>0.001</b> | <b>0.352</b> |
| <i>increaser</i> | GR      | 8.1         | 7.8         | 8.5         | <b>0.04</b> | <b>0.008</b> | <b>0.226</b> | 218         | 185         | 250         | <b>3.78</b>  | <b>0.000</b> | <b>0.406</b> | 1.594       | 1.455       | 1.749       | <b>0.020</b>  | <b>0.002</b> | <b>0.304</b> |
| <i>increaser</i> | LA      | -1.1        | -1.3        | -0.9        | <b>0.04</b> | <b>0.015</b> | <b>0.194</b> | 53          | 53          | 53          | -0.03        | 0.953        | 0.000        | -0.341      | -0.201      | -0.488      | <b>-0.030</b> | <b>0.016</b> | <b>0.190</b> |
| <i>increaser</i> | LB      | 10.7        | 10.5        | 10.8        | 0.04        | 0.094        | 0.097        | 150         | 152         | 148         | -0.54        | 0.419        | 0.023        | -0.023      | -0.012      | -0.068      | <b>-0.010</b> | <b>0.039</b> | <b>0.143</b> |
| <i>increaser</i> | PL      | -1.9        | -2.1        | -1.7        | <b>0.04</b> | <b>0.011</b> | <b>0.208</b> | 29          | 30          | 28          | -0.36        | 0.254        | 0.046        | -0.760      | -0.554      | -1.067      | <b>-0.083</b> | <b>0.009</b> | <b>0.222</b> |
| <i>increaser</i> | RE      | 2.1         | 1.9         | 2.4         | <b>0.04</b> | <b>0.039</b> | <b>0.144</b> | 71          | 67          | 75          | 0.17         | 0.750        | 0.004        | -0.611      | -0.601      | -0.627      | -0.009        | 0.292        | 0.040        |
| <i>increaser</i> | TL      | 9.8         | 9.6         | 10.0        | 0.03        | 0.060        | 0.120        | 103         | 117         | 89          | <b>-1.61</b> | <b>0.006</b> | <b>0.236</b> | -1.013      | -0.867      | -1.149      | <b>-0.019</b> | <b>0.000</b> | <b>0.470</b> |
| <i>increaser</i> | UM      | 8.8         | 8.2         | 9.3         | <b>0.07</b> | <b>0.001</b> | <b>0.326</b> | 203         | 206         | 200         | -0.66        | 0.527        | 0.014        | 1.489       | 1.563       | 1.399       | -0.010        | 0.146        | 0.074        |
| <i>increaser</i> | ZA      | 2.7         | 2.4         | 3.0         | <b>0.05</b> | <b>0.000</b> | <b>0.421</b> | 60          | 68          | 51          | -0.83        | 0.222        | 0.053        | -0.101      | -0.012      | -0.194      | -0.015        | 0.096        | 0.096        |
|                  | mean    | 4.9         | 4.5         | 5.2         | 0.05        | 0.027        | 0.245        | 117.3       | 116.8       | 117.8       | -0.09        | 0.406        | 0.071        | 0.242       | 0.329       | 0.149       | -0.017        | 0.209        | 0.165        |
| <i>decreaser</i> | BL      | 8.7         | 8.1         | 9.4         | <b>0.06</b> | <b>0.010</b> | <b>0.214</b> | 116         | 117         | 115         | -0.28        | 0.729        | 0.004        | -0.060      | 0.059       | -0.244      | <b>-0.018</b> | <b>0.004</b> | <b>0.259</b> |
| <i>decreaser</i> | DE      | 8.0         | 7.9         | 8.0         | 0.01        | 0.794        | 0.002        | 103         | 102         | 103         | -0.17        | 0.767        | 0.003        | -0.605      | -0.549      | -0.632      | -0.002        | 0.535        | 0.014        |
| <i>decreaser</i> | HE      | 8.6         | 8.4         | 8.7         | 0.01        | 0.494        | 0.017        | 63          | 83          | 44          | <b>-2.11</b> | <b>0.000</b> | <b>0.411</b> | -0.973      | -0.823      | -1.185      | <b>-0.027</b> | <b>0.000</b> | <b>0.535</b> |
| <i>decreaser</i> | KG      | 8.6         | 8.3         | 8.9         | <b>0.03</b> | <b>0.020</b> | <b>0.178</b> | 94          | 92          | 97          | 0.32         | 0.495        | 0.017        | -0.494      | -0.482      | -0.549      | -0.006        | 0.240        | 0.049        |
| <i>decreaser</i> | KY      | 8.7         | 8.3         | 9.1         | <b>0.06</b> | <b>0.008</b> | <b>0.226</b> | 80          | 92          | 67          | -1.05        | 0.143        | 0.075        | -0.756      | -0.652      | -0.787      | -0.003        | 0.686        | 0.006        |
| <i>decreaser</i> | VA      | 10.4        | 10.2        | 10.5        | 0.05        | 0.101        | 0.093        | 141         | 140         | 141         | -0.05        | 0.937        | 0.000        | 0.250       | 0.208       | 0.305       | -0.001        | 0.870        | 0.001        |
|                  | mean    | 8.8         | 8.5         | 9.1         | 0.04        | 0.238        | 0.122        | 99.5        | 104.4       | 94.6        | -0.56        | 0.512        | 0.085        | -0.440      | -0.373      | -0.515      | -0.010        | 0.389        | 0.144        |

**Table S5. Pearson's correlation coefficients between standardized shrub chronologies and monthly (from previous June to current August) Pan-Arctic SIE (raw data) for the study period (1979-2008).** Significant values ( $p < 0.05$ ) are indicated in black, whereas bold values represent significant coefficients obtained with P-values adjusted for the false discovery rate. Blue cells - *increasers*; red cells - *decreasers*.

| Chronology ID | pJun          | pJul          | pAug          | pSep          | pOct          | pNov          | pDec          | JAN           | FEB           | MAR           | APR           | MAY           | JUN           | JUL           | AUG           |
|---------------|---------------|---------------|---------------|---------------|---------------|---------------|---------------|---------------|---------------|---------------|---------------|---------------|---------------|---------------|---------------|
| AF_SAR        | -0.124        | -0.361        | -0.457        | -0.439        | <b>-0.544</b> | -0.209        | -0.178        | -0.074        | -0.057        | -0.020        | -0.003        | 0.040         | -0.110        | -0.183        | -0.260        |
| BL_BGL        | <b>0.654</b>  | <b>0.492</b>  | <b>0.540</b>  | <b>0.415</b>  | <b>0.414</b>  | <b>0.399</b>  | <b>0.552</b>  | <b>0.618</b>  | <b>0.602</b>  | <b>0.608</b>  | <b>0.645</b>  | <b>0.613</b>  | <b>0.582</b>  | <b>0.555</b>  | <b>0.549</b>  |
| BS_BGL        | <b>-0.531</b> | <b>-0.654</b> | <b>-0.645</b> | <b>-0.715</b> | <b>-0.783</b> | <b>-0.657</b> | <b>-0.683</b> | <b>-0.635</b> | <b>-0.570</b> | <b>-0.509</b> | <b>-0.423</b> | -0.315        | <b>-0.634</b> | <b>-0.602</b> | <b>-0.561</b> |
| BT_BGL        | -0.302        | -0.356        | -0.210        | -0.255        | -0.314        | -0.367        | -0.295        | -0.334        | -0.231        | -0.285        | -0.232        | -0.100        | -0.380        | -0.350        | -0.184        |
| DE_SGL        | <b>0.512</b>  | <b>0.489</b>  | <b>0.508</b>  | <b>0.566</b>  | <b>0.506</b>  | <b>0.410</b>  | <b>0.599</b>  | <b>0.555</b>  | <b>0.569</b>  | <b>0.456</b>  | <b>0.466</b>  | <b>0.435</b>  | <b>0.595</b>  | <b>0.528</b>  | <b>0.546</b>  |
| DK_BNA        | <b>-0.461</b> | <b>-0.451</b> | -0.310        | -0.304        | <b>-0.501</b> | <b>-0.645</b> | <b>-0.446</b> | <b>-0.466</b> | -0.371        | <b>-0.415</b> | -0.342        | -0.114        | -0.366        | <b>-0.515</b> | <b>-0.444</b> |
| EB_SPO        | -0.171        | -0.073        | -0.045        | -0.059        | -0.082        | -0.172        | -0.295        | -0.207        | -0.204        | -0.088        | -0.265        | -0.249        | -0.406        | -0.386        | -0.281        |
| GR_BGL        | -0.343        | -0.306        | -0.431        | -0.480        | -0.397        | -0.408        | -0.439        | -0.386        | -0.377        | -0.305        | -0.159        | -0.158        | -0.313        | -0.364        | -0.403        |
| HE_SAR        | <b>0.594</b>  | <b>0.446</b>  | <b>0.522</b>  | <b>0.455</b>  | <b>0.428</b>  | <b>0.368</b>  | <b>0.554</b>  | <b>0.600</b>  | <b>0.675</b>  | <b>0.597</b>  | <b>0.617</b>  | <b>0.640</b>  | <b>0.573</b>  | <b>0.568</b>  | <b>0.689</b>  |
| HE_SRI        | <b>0.709</b>  | <b>0.620</b>  | <b>0.688</b>  | <b>0.682</b>  | <b>0.552</b>  | <b>0.630</b>  | <b>0.746</b>  | <b>0.801</b>  | <b>0.803</b>  | <b>0.743</b>  | <b>0.739</b>  | <b>0.743</b>  | <b>0.795</b>  | <b>0.692</b>  | <b>0.664</b>  |
| KG_BNA        | 0.344         | 0.364         | <b>0.398</b>  | <b>0.456</b>  | <b>0.482</b>  | <b>0.559</b>  | <b>0.522</b>  | <b>0.560</b>  | <b>0.522</b>  | <b>0.473</b>  | <b>0.404</b>  | 0.359         | <b>0.405</b>  | 0.327         | 0.343         |
| KG_SGL        | 0.250         | 0.348         | <b>0.418</b>  | <b>0.467</b>  | <b>0.428</b>  | 0.346         | <b>0.387</b>  | <b>0.486</b>  | <b>0.523</b>  | <b>0.462</b>  | <b>0.442</b>  | <b>0.445</b>  | 0.361         | 0.170         | 0.292         |
| KY_BNA        | <b>0.493</b>  | <b>0.495</b>  | <b>0.373</b>  | <b>0.374</b>  | <b>0.447</b>  | <b>0.487</b>  | <b>0.482</b>  | <b>0.554</b>  | <b>0.536</b>  | <b>0.576</b>  | <b>0.590</b>  | <b>0.427</b>  | <b>0.480</b>  | <b>0.376</b>  | <b>0.424</b>  |
| KY_SPU        | <b>0.511</b>  | <b>0.540</b>  | <b>0.453</b>  | <b>0.460</b>  | <b>0.398</b>  | <b>0.507</b>  | <b>0.385</b>  | <b>0.473</b>  | <b>0.449</b>  | <b>0.491</b>  | <b>0.544</b>  | <b>0.384</b>  | 0.320         | 0.303         | 0.309         |
| LA_SAR        | -0.044        | -0.186        | -0.173        | -0.246        | -0.444        | -0.134        | -0.113        | -0.008        | -0.037        | 0.039         | 0.116         | 0.213         | -0.154        | -0.223        | -0.250        |
| LB_SRI        | <b>-0.493</b> | -0.374        | <b>-0.517</b> | <b>-0.470</b> | -0.307        | -0.279        | -0.316        | <b>-0.448</b> | <b>-0.558</b> | <b>-0.548</b> | <b>-0.583</b> | <b>-0.609</b> | <b>-0.539</b> | <b>-0.475</b> | <b>-0.547</b> |
| PL_SAR        | -0.321        | -0.309        | -0.367        | -0.338        | <b>-0.517</b> | <b>-0.565</b> | <b>-0.528</b> | -0.319        | -0.300        | -0.192        | -0.335        | -0.320        | -0.369        | -0.397        | <b>-0.491</b> |
| RE_SAR        | -0.179        | -0.138        | -0.130        | -0.062        | -0.083        | -0.126        | -0.164        | -0.031        | -0.083        | -0.116        | -0.121        | -0.072        | 0.019         | -0.193        | -0.325        |
| TL_BNA        | -0.105        | -0.199        | -0.239        | -0.277        | -0.188        | -0.322        | -0.144        | -0.175        | -0.156        | -0.198        | -0.210        | -0.262        | -0.261        | -0.248        | -0.215        |
| UM_BGL        | <b>-0.483</b> | -0.308        | -0.386        | -0.373        | -0.380        | <b>-0.434</b> | <b>-0.478</b> | <b>-0.541</b> | <b>-0.490</b> | <b>-0.415</b> | <b>-0.397</b> | -0.326        | <b>-0.634</b> | <b>-0.598</b> | <b>-0.493</b> |
| VA_SRI        | 0.285         | 0.454         | 0.265         | 0.290         | <b>0.500</b>  | <b>0.562</b>  | <b>0.491</b>  | 0.281         | 0.093         | 0.112         | 0.172         | 0.018         | 0.131         | 0.140         | 0.109         |
| YR_SRI        | -0.099        | -0.045        | -0.234        | -0.181        | -0.052        | 0.143         | 0.016         | -0.010        | -0.150        | -0.121        | -0.164        | -0.266        | -0.165        | -0.116        | -0.183        |
| ZA_SAR        | -0.089        | -0.315        | <b>-0.373</b> | <b>-0.398</b> | <b>-0.463</b> | -0.165        | -0.128        | -0.098        | -0.065        | -0.020        | -0.031        | 0.028         | -0.090        | -0.075        | -0.156        |

**Table S6. Pearson's correlation coefficients between standardized shrub chronologies and monthly (from previous June to current August) Pan-Arctic SIE (raw data) for the maximum chronology timespan (1979-max. 2016, see Table S1).** Significant values ( $p < 0.05$ ) are indicated in black, whereas bold values represent significant coefficients obtained with P-values adjusted for the false discovery rate. Blue cells - *increasers*; red cells - *decreasers*.

| Chronology ID | pJun          | pJul          | pAug          | pSep          | pOct          | pNov          | pDec          | JAN           | FEB           | MAR           | APR           | MAY           | JUN           | JUL           | AUG           |
|---------------|---------------|---------------|---------------|---------------|---------------|---------------|---------------|---------------|---------------|---------------|---------------|---------------|---------------|---------------|---------------|
| AF_SAR        | -0.124        | -0.361        | -0.457        | -0.439        | <b>-0.544</b> | -0.209        | -0.178        | -0.074        | -0.057        | -0.020        | -0.003        | 0.040         | -0.110        | -0.183        | -0.260        |
| BL_BGL        | <b>0.701</b>  | <b>0.559</b>  | <b>0.610</b>  | <b>0.513</b>  | <b>0.492</b>  | <b>0.462</b>  | <b>0.617</b>  | <b>0.665</b>  | <b>0.655</b>  | <b>0.639</b>  | <b>0.637</b>  | <b>0.607</b>  | <b>0.638</b>  | <b>0.622</b>  | <b>0.614</b>  |
| BS_BGL        | <b>-0.551</b> | <b>-0.667</b> | <b>-0.656</b> | <b>-0.711</b> | <b>-0.791</b> | <b>-0.667</b> | <b>-0.694</b> | <b>-0.648</b> | <b>-0.587</b> | <b>-0.525</b> | <b>-0.432</b> | -0.316        | <b>-0.648</b> | <b>-0.619</b> | <b>-0.579</b> |
| BT_BGL        | -0.288        | -0.344        | -0.196        | -0.229        | -0.308        | -0.361        | -0.281        | -0.327        | -0.226        | -0.281        | -0.231        | -0.101        | -0.370        | -0.338        | -0.178        |
| DE_SGL        | <b>0.512</b>  | <b>0.489</b>  | <b>0.508</b>  | <b>0.566</b>  | <b>0.506</b>  | <b>0.410</b>  | <b>0.599</b>  | <b>0.555</b>  | <b>0.569</b>  | <b>0.456</b>  | <b>0.466</b>  | <b>0.435</b>  | <b>0.595</b>  | <b>0.528</b>  | <b>0.546</b>  |
| DK_BNA        | <b>-0.554</b> | <b>-0.561</b> | <b>-0.485</b> | <b>-0.498</b> | <b>-0.620</b> | <b>-0.678</b> | <b>-0.557</b> | <b>-0.567</b> | <b>-0.510</b> | <b>-0.486</b> | <b>-0.358</b> | -0.194        | <b>-0.549</b> | <b>-0.628</b> | <b>-0.569</b> |
| EB_SPO        | -0.179        | -0.090        | -0.065        | -0.077        | -0.101        | -0.183        | -0.295        | -0.218        | -0.214        | -0.102        | -0.269        | -0.256        | -0.385        | -0.375        | -0.283        |
| GR_BGL        | -0.171        | -0.171        | -0.275        | -0.289        | -0.247        | -0.272        | -0.240        | -0.231        | -0.231        | -0.188        | -0.096        | -0.099        | -0.158        | -0.189        | -0.241        |
| HE_SAR        | <b>0.594</b>  | <b>0.446</b>  | <b>0.522</b>  | <b>0.455</b>  | <b>0.428</b>  | <b>0.368</b>  | <b>0.554</b>  | <b>0.600</b>  | <b>0.675</b>  | <b>0.597</b>  | <b>0.617</b>  | <b>0.640</b>  | <b>0.573</b>  | <b>0.568</b>  | <b>0.689</b>  |
| HE_SRI        | <b>0.709</b>  | <b>0.620</b>  | <b>0.688</b>  | <b>0.682</b>  | <b>0.552</b>  | <b>0.630</b>  | <b>0.746</b>  | <b>0.801</b>  | <b>0.803</b>  | <b>0.743</b>  | <b>0.739</b>  | <b>0.743</b>  | <b>0.795</b>  | <b>0.692</b>  | <b>0.664</b>  |
| KG_BNA        | <b>0.574</b>  | <b>0.564</b>  | <b>0.573</b>  | <b>0.616</b>  | <b>0.638</b>  | <b>0.687</b>  | <b>0.686</b>  | <b>0.694</b>  | <b>0.675</b>  | <b>0.605</b>  | <b>0.474</b>  | <b>0.458</b>  | <b>0.614</b>  | <b>0.578</b>  | <b>0.556</b>  |
| KG_SGL        | <b>0.376</b>  | <b>0.416</b>  | <b>0.470</b>  | <b>0.513</b>  | <b>0.467</b>  | <b>0.434</b>  | <b>0.488</b>  | <b>0.550</b>  | <b>0.587</b>  | <b>0.543</b>  | <b>0.490</b>  | <b>0.482</b>  | <b>0.454</b>  | 0.332         | <b>0.370</b>  |
| KY_BNA        | 0.350         | 0.373         | 0.218         | 0.181         | 0.354         | 0.402         | 0.341         | 0.456         | 0.427         | <b>0.488</b>  | <b>0.530</b>  | 0.399         | 0.376         | 0.263         | 0.310         |
| KY_SPU        | <b>0.511</b>  | <b>0.540</b>  | <b>0.453</b>  | <b>0.460</b>  | <b>0.398</b>  | <b>0.507</b>  | <b>0.385</b>  | <b>0.473</b>  | <b>0.449</b>  | <b>0.491</b>  | <b>0.544</b>  | 0.384         | 0.320         | 0.303         | 0.309         |
| LA_SAR        | -0.044        | -0.186        | -0.173        | -0.246        | <b>-0.444</b> | -0.134        | -0.113        | -0.008        | -0.037        | 0.039         | 0.116         | 0.213         | -0.154        | -0.223        | -0.250        |
| LB_SRI        | <b>-0.493</b> | -0.374        | <b>-0.517</b> | <b>-0.470</b> | -0.307        | -0.279        | -0.316        | <b>-0.448</b> | <b>-0.558</b> | <b>-0.548</b> | <b>-0.583</b> | <b>-0.609</b> | <b>-0.539</b> | <b>-0.475</b> | <b>-0.547</b> |
| PL_SAR        | -0.186        | -0.122        | -0.149        | -0.144        | -0.287        | <b>-0.374</b> | -0.332        | -0.209        | -0.193        | -0.139        | -0.249        | -0.228        | -0.274        | -0.226        | -0.291        |
| RE_SAR        | -0.179        | -0.138        | -0.130        | -0.062        | -0.083        | -0.126        | -0.164        | -0.031        | -0.083        | -0.116        | -0.121        | -0.072        | 0.019         | -0.193        | -0.325        |
| TL_BNA        | -0.320        | -0.303        | -0.353        | -0.378        | -0.379        | -0.401        | -0.304        | -0.260        | -0.228        | -0.174        | -0.138        | -0.180        | -0.306        | -0.370        | -0.329        |
| UM_BGL        | <b>-0.413</b> | -0.254        | -0.307        | -0.277        | -0.309        | <b>-0.387</b> | <b>-0.401</b> | <b>-0.479</b> | <b>-0.426</b> | <b>-0.382</b> | <b>-0.384</b> | -0.315        | <b>-0.518</b> | <b>-0.505</b> | <b>-0.422</b> |
| VA_SRI        | 0.285         | <b>0.454</b>  | 0.265         | 0.290         | <b>0.500</b>  | <b>0.562</b>  | <b>0.491</b>  | 0.281         | 0.093         | 0.112         | 0.172         | 0.018         | 0.131         | 0.140         | 0.109         |
| YR_SRI        | -0.100        | -0.048        | -0.225        | -0.171        | -0.055        | 0.138         | 0.008         | -0.015        | -0.150        | -0.123        | -0.165        | -0.266        | -0.166        | -0.118        | -0.182        |
| ZA_SAR        | -0.121        | -0.336        | -0.360        | -0.355        | <b>-0.506</b> | -0.222        | -0.168        | -0.163        | -0.135        | -0.059        | -0.033        | -0.021        | -0.211        | -0.158        | -0.208        |



**Table S7. Pearson's correlation coefficients between standardized shrub chronologies and monthly (from previous June to current August) regional SIE (raw data) for common period (1979-2008).** Significant values ( $p < 0.05$ ) are indicated in black, whereas bold values represent significant coefficients obtained with P-values adjusted for the false discovery rate. Blue cells - *increasers*; red cells - *decreasers*.

| Chronology ID | pJun          | pJul          | pAug          | pSep          | pOct          | pNov          | pDec          | JAN           | FEB           | MAR           | APR           | MAY           | JUN           | JUL           | AUG           |
|---------------|---------------|---------------|---------------|---------------|---------------|---------------|---------------|---------------|---------------|---------------|---------------|---------------|---------------|---------------|---------------|
| AF_SAR        | 0.000         | -0.160        | -0.166        | -0.157        | -0.086        | -0.025        | 0.074         | 0.187         | 0.154         | 0.190         | 0.163         | -0.014        | -0.091        | -0.073        | -0.120        |
| BL_BGL        | 0.222         | 0.221         | 0.251         | 0.255         | 0.445         | 0.311         | 0.108         | 0.270         | 0.276         | 0.046         | 0.219         | 0.397         | 0.238         | 0.422         | 0.476         |
| BS_BGL        | <b>-0.522</b> | <b>-0.525</b> | <b>-0.492</b> | <b>-0.411</b> | <b>-0.495</b> | <b>-0.532</b> | <b>-0.471</b> | -0.173        | -0.277        | -0.199        | -0.030        | -0.347        | <b>-0.701</b> | <b>-0.610</b> | <b>-0.551</b> |
| BT_BGL        | <b>-0.538</b> | <b>-0.408</b> | -0.369        | <b>-0.424</b> | <b>-0.453</b> | <b>-0.479</b> | <b>-0.546</b> | -0.300        | 0.129         | -0.090        | -0.064        | <b>-0.466</b> | <b>-0.706</b> | <b>-0.520</b> | <b>-0.437</b> |
| DE_SGL        | 0.021         | -0.006        | 0.087         | 0.321         | 0.145         | 0.026         | 0.276         | -0.335        | 0.096         | 0.260         | 0.002         | -0.089        | -0.134        | -0.134        | 0.033         |
| DK_BNA        | <b>-0.522</b> | -0.350        | -0.142        | 0.132         | -0.122        | <b>-0.497</b> | <b>-0.647</b> | <b>-0.564</b> | <b>-0.484</b> | <b>-0.464</b> | <b>-0.490</b> | <b>-0.452</b> | <b>-0.529</b> | <b>-0.571</b> | -0.405        |
| EB_SPO        | -0.121        | -0.263        | -0.256        | -0.284        | <b>-0.404</b> | -0.268        | -0.264        | -0.189        | -0.203        | -0.131        | -0.031        | -0.067        | -0.032        | -0.152        | -0.265        |
| GR_BGL        | -0.269        | -0.146        | -0.259        | -0.189        | -0.284        | -0.322        | -0.304        | -0.091        | -0.167        | -0.215        | 0.214         | -0.097        | -0.264        | -0.317        | -0.357        |
| HE_SAR        | 0.015         | 0.004         | -0.038        | 0.168         | 0.184         | 0.023         | 0.345         | -0.024        | 0.143         | 0.336         | 0.089         | -0.210        | -0.105        | 0.062         | 0.156         |
| HE_SRI        | -0.029        | -0.061        | 0.018         | 0.373         | 0.172         | -0.038        | 0.239         | -0.013        | 0.282         | 0.164         | 0.245         | 0.068         | 0.086         | 0.077         | 0.078         |
| KG_BNA        | <b>0.603</b>  | <b>0.537</b>  | 0.275         | 0.178         | <b>0.390</b>  | <b>0.439</b>  | <b>0.498</b>  | <b>0.415</b>  | <b>0.503</b>  | <b>0.505</b>  | <b>0.481</b>  | <b>0.485</b>  | <b>0.493</b>  | <b>0.463</b>  | 0.192         |
| KG_SGL        | 0.392         | 0.456         | 0.378         | 0.336         | 0.511         | 0.357         | 0.293         | 0.173         | 0.132         | 0.195         | 0.232         | 0.226         | 0.274         | 0.271         | 0.085         |
| KY_BNA        | -0.251        | -0.184        | 0.040         | 0.156         | 0.184         | 0.164         | 0.129         | -0.246        | 0.084         | -0.117        | -0.051        | -0.063        | -0.083        | -0.092        | 0.112         |
| KY_SPU        | 0.053         | 0.096         | 0.286         | 0.410         | 0.450         | 0.353         | 0.268         | <b>-0.373</b> | 0.143         | -0.171        | -0.064        | -0.044        | -0.054        | -0.091        | 0.117         |
| LA_SAR        | 0.241         | 0.118         | -0.168        | <b>-0.441</b> | <b>-0.443</b> | <b>-0.363</b> | -0.269        | -0.130        | -0.160        | -0.075        | 0.170         | 0.171         | 0.146         | 0.213         | 0.032         |
| LB_SRI        | -0.122        | -0.103        | -0.021        | 0.168         | 0.070         | -0.010        | -0.091        | -0.227        | <b>-0.338</b> | 0.285         | -0.012        | 0.040         | -0.158        | <b>-0.366</b> | -0.193        |
| PL_SAR        | -0.076        | -0.160        | -0.237        | -0.297        | -0.313        | -0.262        | -0.218        | 0.121         | 0.004         | -0.048        | 0.295         | 0.143         | 0.274         | 0.265         | -0.069        |
| RE_SAR        | 0.045         | -0.136        | -0.225        | -0.200        | <b>-0.414</b> | -0.004        | -0.050        | 0.068         | 0.046         | 0.026         | 0.009         | -0.093        | -0.101        | -0.205        | <b>-0.443</b> |
| TL_BNA        | -0.165        | -0.151        | -0.298        | <b>-0.376</b> | <b>-0.437</b> | -0.170        | -0.121        | -0.027        | -0.005        | -0.114        | 0.078         | -0.266        | <b>-0.339</b> | <b>-0.482</b> | <b>-0.480</b> |
| UM_BGL        | -0.066        | 0.020         | -0.210        | -0.196        | -0.314        | <b>-0.347</b> | -0.118        | <b>-0.275</b> | <b>-0.230</b> | -0.111        | -0.018        | <b>-0.313</b> | <b>-0.548</b> | <b>-0.576</b> | <b>-0.473</b> |
| VA_SRI        | -0.019        | 0.212         | 0.417         | 0.405         | 0.481         | 0.400         | 0.257         | 0.005         | -0.191        | -0.069        | -0.124        | -0.151        | -0.049        | 0.020         | 0.207         |
| YR_SRI        | -0.082        | -0.012        | -0.026        | 0.071         | -0.034        | 0.095         | 0.191         | -0.118        | -0.150        | 0.019         | -0.122        | 0.071         | -0.031        | -0.170        | -0.043        |
| ZA_SAR        | 0.030         | 0.008         | 0.149         | 0.223         | 0.151         | 0.102         | 0.026         | -0.042        | -0.071        | -0.060        | 0.144         | 0.250         | 0.024         | -0.150        | -0.186        |

**Table S8. Output of linear regression models between standardized shrub chronologies and seasonal Pan-Arctic and regional SIE (all data z-score) for common period (1979-2008).** List of predictors and data sources are presented in Table S9. Significant values ( $p < 0.05$ ) indicated in bold. Blue font - *increasers*; red font - *decreasers*. Grey font - non-significant values.

| Chronology ID | JJA SIE        |               |              |                |               |              | pSON SIE       |               |              |                |               |              | DJF SIE        |               |              |                |               |              | MAM SIE        |               |              |                |               |              |
|---------------|----------------|---------------|--------------|----------------|---------------|--------------|----------------|---------------|--------------|----------------|---------------|--------------|----------------|---------------|--------------|----------------|---------------|--------------|----------------|---------------|--------------|----------------|---------------|--------------|
|               | Pan-Arctic     |               |              | regional       |               |              | Pan-Arctic     |               |              | regional       |               |              | Pan-Arctic     |               |              | regional       |               |              | Pan-Arctic     |               |              | regional       |               |              |
|               | R <sup>2</sup> | β             | p-value      | R <sup>2</sup> | β             | p-value      | R <sup>2</sup> | β             | p-value      | R <sup>2</sup> | β             | p-value      | R <sup>2</sup> | β             | p-value      | R <sup>2</sup> | β             | p-value      | R <sup>2</sup> | β             | p-value      | R <sup>2</sup> | β             | p-value      |
| AF_SAR        | 0.043          | -0.078        | 0.272        | 0.011          | -0.034        | 0.578        | <b>0.191</b>   | <b>-0.165</b> | <b>0.018</b> | 0.012          | -0.033        | 0.578        | 0.012          | -0.036        | 0.578        | 0.022          | 0.043         | 0.439        | 0.000          | 0.002         | 0.972        | 0.014          | 0.032         | 0.537        |
| BL_BGL        | <b>0.341</b>   | <b>0.243</b>  | <b>0.001</b> | <b>0.173</b>   | <b>0.141</b>  | <b>0.022</b> | 0.194          | <b>0.184</b>  | <b>0.017</b> | <b>0.146</b>   | <b>0.131</b>  | <b>0.040</b> | <b>0.203</b>   | <b>0.168</b>  | <b>0.014</b> | 0.070          | 0.159         | 0.165        | <b>0.425</b>   | <b>0.226</b>  | <b>0.000</b> | 0.116          | 0.205         | 0.065        |
| BS_BGL        | <b>0.382</b>   | <b>-0.429</b> | <b>0.000</b> | <b>0.466</b>   | <b>-0.386</b> | <b>0.000</b> | <b>0.599</b>   | <b>-0.533</b> | <b>0.000</b> | <b>0.295</b>   | <b>-0.306</b> | <b>0.002</b> | <b>0.373</b>   | <b>-0.375</b> | <b>0.000</b> | <b>0.213</b>   | <b>-0.457</b> | <b>0.012</b> | <b>0.194</b>   | <b>-0.255</b> | <b>0.015</b> | 0.075          | -0.275        | 0.143        |
| BT_BGL        | 0.091          | -0.246        | 0.105        | <b>0.372</b>   | <b>-0.406</b> | <b>0.000</b> | 0.107          | -0.261        | 0.083        | <b>0.253</b>   | <b>-0.329</b> | <b>0.005</b> | 0.073          | -0.193        | 0.155        | 0.042          | -0.234        | 0.289        | 0.048          | -0.150        | 0.243        | 0.085          | -0.344        | 0.119        |
| DE_SGL        | <b>0.329</b>   | <b>0.181</b>  | <b>0.001</b> | 0.009          | -0.026        | 0.623        | 0.292          | <b>0.172</b>  | <b>0.002</b> | 0.031          | 0.070         | 0.362        | <b>0.306</b>   | <b>0.157</b>  | <b>0.002</b> | 0.000          | 0.003         | 0.960        | <b>0.228</b>   | <b>0.126</b>  | <b>0.008</b> | 0.046          | 0.128         | 0.253        |
| DK_BNA        | <b>0.223</b>   | <b>-0.274</b> | <b>0.008</b> | <b>0.303</b>   | <b>-0.272</b> | <b>0.002</b> | <b>0.247</b>   | <b>-0.286</b> | <b>0.006</b> | 0.028          | -0.078        | 0.390        | <b>0.205</b>   | <b>-0.233</b> | <b>0.014</b> | <b>0.386</b>   | <b>-0.275</b> | <b>0.000</b> | 0.095          | -0.150        | 0.097        | <b>0.239</b>   | <b>-0.206</b> | <b>0.006</b> |
| EB_SPO        | <b>0.131</b>   | <b>-0.184</b> | <b>0.049</b> | 0.029          | -0.077        | 0.367        | 0.011          | -0.054        | 0.583        | 0.112          | -0.137        | 0.076        | 0.030          | -0.079        | 0.365        | 0.039          | -0.085        | 0.305        | 0.044          | -0.089        | 0.266        | 0.007          | -0.036        | 0.671        |
| GR_BGL        | <b>0.148</b>   | <b>-0.132</b> | <b>0.039</b> | 0.118          | -0.094        | 0.068        | <b>0.218</b>   | <b>-0.158</b> | <b>0.011</b> | 0.092          | -0.084        | 0.109        | <b>0.242</b>   | <b>-0.148</b> | <b>0.007</b> | 0.090          | -0.146        | 0.114        | 0.049          | -0.065        | 0.250        | 0.000          | -0.007        | 0.945        |
| HE_SAR        | <b>0.416</b>   | <b>0.408</b>  | <b>0.000</b> | 0.001          | 0.017         | 0.874        | <b>0.206</b>   | <b>0.278</b>  | <b>0.013</b> | 0.018          | 0.101         | 0.493        | <b>0.257</b>   | <b>0.278</b>  | <b>0.005</b> | 0.047          | 0.131         | 0.259        | <b>0.419</b>   | <b>0.341</b>  | <b>0.000</b> | 0.059          | 0.289         | 0.195        |
| HE_SRI        | <b>0.537</b>   | <b>0.306</b>  | <b>0.000</b> | 0.007          | 0.032         | 0.653        | <b>0.454</b>   | <b>0.255</b>  | <b>0.000</b> | 0.028          | 0.079         | 0.387        | <b>0.542</b>   | <b>0.248</b>  | <b>0.000</b> | 0.057          | 0.090         | 0.210        | <b>0.604</b>   | <b>0.270</b>  | <b>0.000</b> | 0.038          | 0.153         | 0.301        |
| KG_BNA        | <b>0.133</b>   | <b>0.137</b>  | <b>0.047</b> | <b>0.174</b>   | <b>0.133</b>  | <b>0.022</b> | <b>0.281</b>   | <b>0.201</b>  | <b>0.003</b> | <b>0.146</b>   | <b>0.118</b>  | <b>0.041</b> | <b>0.343</b>   | <b>0.198</b>  | <b>0.001</b> | <b>0.248</b>   | <b>0.145</b>  | <b>0.006</b> | <b>0.189</b>   | <b>0.136</b>  | <b>0.016</b> | <b>0.261</b>   | <b>0.140</b>  | <b>0.004</b> |
| KG_SGL        | 0.074          | 0.103         | 0.145        | 0.052          | 0.073         | 0.225        | <b>0.206</b>   | <b>0.168</b>  | <b>0.014</b> | <b>0.195</b>   | <b>0.133</b>  | <b>0.017</b> | <b>0.220</b>   | <b>0.154</b>  | <b>0.010</b> | 0.057          | 0.068         | 0.211        | <b>0.223</b>   | <b>0.149</b>  | <b>0.008</b> | 0.051          | 0.062         | 0.228        |
| KY_BNA        | <b>0.190</b>   | <b>0.142</b>  | <b>0.016</b> | 0.001          | -0.007        | 0.892        | <b>0.212</b>   | <b>0.143</b>  | <b>0.012</b> | 0.033          | 0.056         | 0.342        | <b>0.234</b>   | <b>0.133</b>  | <b>0.008</b> | 0.003          | -0.022        | 0.764        | <b>0.314</b>   | <b>0.152</b>  | <b>0.001</b> | 0.013          | -0.036        | 0.549        |
| KY_SPU        | 0.104          | 0.157         | 0.082        | 0.000          | -0.005        | 0.952        | <b>0.237</b>   | <b>0.234</b>  | <b>0.007</b> | <b>0.195</b>   | <b>0.211</b>  | <b>0.016</b> | <b>0.276</b>   | <b>0.226</b>  | <b>0.003</b> | 0.002          | 0.024         | 0.836        | <b>0.247</b>   | <b>0.201</b>  | <b>0.005</b> | 0.019          | -0.064        | 0.469        |
| LA_SAR        | 0.052          | -0.132        | 0.224        | 0.024          | 0.132         | 0.410        | 0.088          | -0.173        | 0.118        | <b>0.222</b>   | <b>-0.352</b> | <b>0.010</b> | 0.006          | -0.039        | 0.699        | 0.055          | -0.260        | 0.223        | 0.015          | 0.060         | 0.514        | 0.029          | 0.123         | 0.366        |
| LB_SRI        | <b>0.294</b>   | <b>-0.285</b> | <b>0.003</b> | 0.070          | -0.145        | 0.174        | <b>0.165</b>   | <b>-0.241</b> | <b>0.036</b> | 0.016          | 0.075         | 0.526        | <b>0.185</b>   | <b>-0.186</b> | <b>0.025</b> | 0.048          | -0.408        | 0.270        | <b>0.372</b>   | <b>-0.239</b> | <b>0.001</b> | 0.001          | 0.018         | 0.863        |
| PL_SAR        | <b>0.199</b>   | <b>-0.217</b> | <b>0.013</b> | 0.033          | 0.129         | 0.336        | <b>0.243</b>   | <b>-0.241</b> | <b>0.007</b> | 0.106          | -0.205        | 0.084        | 0.128          | -0.156        | 0.057        | 0.001          | -0.022        | 0.903        | 0.088          | -0.120        | 0.112        | 0.056          | 0.142         | 0.209        |
| RE_SAR        | 0.043          | -0.096        | 0.272        | 0.079          | -0.123        | 0.132        | 0.009          | -0.044        | 0.627        | 0.059          | -0.113        | 0.203        | 0.003          | -0.021        | 0.789        | 0.002          | 0.017         | 0.827        | 0.012          | -0.042        | 0.572        | 0.002          | -0.025        | 0.835        |
| TL_BNA        | 0.061          | -0.094        | 0.187        | <b>0.210</b>   | <b>-0.153</b> | <b>0.011</b> | 0.079          | -0.106        | 0.139        | 0.133          | -0.170        | 0.052        | 0.011          | -0.035        | 0.589        | 0.004          | -0.022        | 0.757        | 0.054          | -0.073        | 0.217        | 0.047          | -0.153        | 0.252        |
| UM_BGL        | <b>0.346</b>   | <b>-0.215</b> | <b>0.001</b> | <b>0.343</b>   | <b>-0.175</b> | <b>0.001</b> | <b>0.179</b>   | <b>-0.151</b> | <b>0.022</b> | 0.093          | -0.089        | 0.108        | <b>0.231</b>   | <b>-0.153</b> | <b>0.008</b> | 0.047          | -0.111        | 0.259        | <b>0.160</b>   | <b>-0.122</b> | <b>0.028</b> | 0.042          | -0.109        | 0.277        |
| VA_SRI        | 0.015          | 0.083         | 0.545        | 0.004          | 0.033         | 0.744        | <b>0.236</b>   | <b>0.378</b>  | <b>0.012</b> | <b>0.233</b>   | <b>0.246</b>  | <b>0.013</b> | 0.099          | 0.183         | 0.117        | 0.000          | 0.008         | 0.956        | 0.010          | 0.053         | 0.613        | 0.019          | -0.075        | 0.498        |
| YR_SRI        | 0.026          | -0.064        | 0.394        | 0.008          | -0.043        | 0.628        | 0.003          | -0.021        | 0.785        | 0.002          | 0.021         | 0.825        | 0.001          | 0.012         | 0.860        | 0.000          | -0.012        | 0.949        | 0.036          | -0.063        | 0.314        | 0.001          | -0.019        | 0.838        |
| ZA_SAR        | 0.013          | -0.033        | 0.541        | 0.014          | -0.031        | 0.527        | <b>0.143</b>   | <b>-0.109</b> | <b>0.043</b> | 0.030          | 0.041         | 0.369        | 0.015          | -0.031        | 0.529        | 0.000          | -0.004        | 0.927        | 0.000          | -0.002        | 0.960        | 0.015          | 0.030         | 0.526        |

**Table S9.** List of sea-ice and climate-related predictors used in SEM and analyses and in LME models (fixed effects) together with data sources. Climate variables (temperature, precipitation, SPEI) were calculated from CRU TS 4.01 data. SPEI was calculated using spei package (v1.7) (13, 14) in R. All predictors were standardized before the analyses (z-score), except for SPEI which was already represented by an index. Response variable was represented by ring-width index (RWI), which was a standardized mean annual growth after diameter RCS detrending (i.e., each chronology per responder group for SEM analyses and each shrub for LME models).

| Predictor type                                 | Variable code | Definition                                                                                | Data Source                                                                           |
|------------------------------------------------|---------------|-------------------------------------------------------------------------------------------|---------------------------------------------------------------------------------------|
| Pan-Arctic sea-ice extent (SIE)                | pSON_pA       | previous September-October-November mean Pan-Arctic sea-ice extent                        | NOAA/NSIDC (Climate Data Record of Passive Microwave Sea IceConcentration, Version 2) |
|                                                | DJF_pA        | previous December-January-February mean Pan-Arctic sea-ice extent                         | NOAA/NSIDC (Climate Data Record of Passive Microwave Sea IceConcentration, Version 2) |
|                                                | MAM_pA        | March-April-May mean Pan-Arctic sea-ice extent                                            | NOAA/NSIDC (Climate Data Record of Passive Microwave Sea IceConcentration, Version 2) |
|                                                | JJA_pA        | June-July-August mean Pan-Arctic sea-ice extent                                           | NOAA/NSIDC (Climate Data Record of Passive Microwave Sea IceConcentration, Version 2) |
| Regional sea-ice extent (SIE)                  | pSON          | previous September-October-November mean regional sea-ice extent                          | NOAA/NSIDC (Climate Data Record of Passive Microwave Sea IceConcentration, Version 3) |
|                                                | DJF           | previous December-January-February mean regional sea-ice extent                           | NOAA/NSIDC (Climate Data Record of Passive Microwave Sea IceConcentration, Version 3) |
|                                                | MAM           | March-April-May mean regional sea-ice extent                                              | NOAA/NSIDC (Climate Data Record of Passive Microwave Sea IceConcentration, Version 3) |
|                                                | JJA           | June-July-August mean regional sea-ice extent                                             | NOAA/NSIDC (Climate Data Record of Passive Microwave Sea IceConcentration, Version 3) |
| Timing of regional sea-ice retreat and advance | pFAD          | previous year first advance day of sea-ice at 50% sea-ice concentration threshold         | Stroeve et al. (2016)                                                                 |
|                                                | pLRD          | previous year last retreat day of regional sea-ice at 50% sea-ice concentration threshold | Stroeve et al. (2016)                                                                 |
|                                                | LRD           | last retreat day of regional sea-ice at 50% sea-ice concentration threshold               | Stroeve et al. (2016)                                                                 |
| Climate variables                              | TEMP_JJA      | June-July-August mean temperature                                                         | CRU TS 4.01                                                                           |
|                                                | PRECIP_JJA    | June-July-August precipitation sum                                                        | CRU TS 4.01                                                                           |
|                                                | SPEI_JJA      | June-July-August mean standardized precipitation evaporation index                        | CRU TS 4.01, spei package                                                             |

**Table S10. Piecewise SEM results for *increasers*.** Linear mixed effect (LME) models for RWI, summer (June-to-August, JJA) SPEI, temperature and precipitation were implemented into each SEM with a random intercept for a site included in each model. Models were run for period (1979-2008), except for previous year sea ice variables (i.e. pLRD, pFAD, DJF, pSON, DJF\_pA, pSON\_pA) for which we lack measurements for year 1979. For the source data and the abbreviations, see Table S9.

| Sea ice variable included in the model |         | <i>increasers</i> |                 |                                  |               |              |                  |               |               |                  |               |                  | R <sup>2</sup> endogenous variables |      |          |             |          |       |       |  |
|----------------------------------------|---------|-------------------|-----------------|----------------------------------|---------------|--------------|------------------|---------------|---------------|------------------|---------------|------------------|-------------------------------------|------|----------|-------------|----------|-------|-------|--|
|                                        |         | p-value           | Fisher's C test | Standardized parameter estimates |               |              |                  |               |               |                  |               |                  |                                     | RWI  | SPEI JJA | PRECI P JJA | TEMP JJA | AIC   | AICc  |  |
|                                        |         |                   |                 | RWI                              |               | SPEI JJA     |                  | PRECIP JJA    |               | TEMP JJA         |               |                  |                                     |      |          |             |          |       |       |  |
| Variable code                          |         |                   |                 | Sea ice variable                 | TEMP JJA      | SPEI JJA     | Sea ice variable | PRECI P JJA   | TEMP JJA      | Sea ice variable | TEMP JJA      | Sea ice variable |                                     |      |          |             |          |       |       |  |
| regional sea ice variables             | LRD     | 0.084             | 4.957           | Est.                             | -0.064        | <b>0.425</b> | -0.035           | -0.047        | <b>0.056</b>  | <b>-0.230</b>    | <b>-0.209</b> | <b>-0.208</b>    | <b>-0.463</b>                       | 0.27 | 0.78     | 0.05        | 0.21     | 46.96 | 49.80 |  |
|                                        |         |                   |                 | SE                               | 0.021         | 0.020        | 0.024            | 0.032         | 0.027         | 0.030            | 0.060         | 0.056            | 0.048                               |      |          |             |          |       |       |  |
|                                        |         |                   |                 | df                               | 370           | 370          | 370              | 373           | 373           | 373              | 375           | 375              | 376                                 |      |          |             |          |       |       |  |
|                                        | pLRD    | 0.331             | 2.214           | p-value                          | 0.195         | <b>0.000</b> | 0.591            | 0.096         | <b>0.028</b>  | <b>0.000</b>     | <b>0.000</b>  | <b>0.000</b>     | <b>0.000</b>                        | 0.29 | 0.78     | 0.01        | 0.04     | 44.21 | 46.97 |  |
|                                        |         |                   |                 | Est.                             | <b>-0.130</b> | <b>0.427</b> | -0.040           | -0.020        | <b>0.066</b>  | <b>-0.210</b>    | 0.051         | -0.077           | <b>-0.196</b>                       |      |          |             |          |       |       |  |
|                                        |         |                   |                 | SE                               | 0.019         | 0.019        | 0.025            | 0.029         | 0.027         | 0.028            | 0.055         | 0.053            | 0.053                               |      |          |             |          |       |       |  |
|                                        | pFAD    | 0.194             | 3.28            | df                               | 359           | 359          | 359              | 361           | 361           | 361              | 362           | 362              | 363                                 |      |          |             |          |       |       |  |
|                                        |         |                   |                 | p-value                          | <b>0.004</b>  | <b>0.000</b> | 0.556            | 0.424         | <b>0.008</b>  | <b>0.000</b>     | 0.335         | 0.146            | <b>0.000</b>                        |      |          |             |          |       |       |  |
|                                        |         |                   |                 | Est.                             | <b>0.145</b>  | <b>0.415</b> | -0.040           | 0.004         | <b>0.065</b>  | <b>-0.208</b>    | 0.055         | -0.100           | <b>0.257</b>                        | 0.30 | 0.78     | 0.01        | 0.07     | 45.28 | 48.10 |  |
|                                        | JJA     | 0.058             | 5.707           | SE                               | 0.020         | 0.019        | 0.025            | 0.031         | 0.027         | 0.028            | 0.058         | 0.054            | 0.054                               |      |          |             |          |       |       |  |
|                                        |         |                   |                 | df                               | 359           | 359          | 359              | 361           | 361           | 361              | 362           | 362              | 363                                 |      |          |             |          |       |       |  |
|                                        |         |                   |                 | p-value                          | <b>0.002</b>  | <b>0.000</b> | 0.558            | 0.879         | <b>0.010</b>  | <b>0.000</b>     | 0.306         | 0.060            | <b>0.000</b>                        |      |          |             |          |       |       |  |
| MAM                                    | 0.139   | 3.948             | Est.            | <b>-0.122</b>                    | <b>0.391</b>  | -0.035       | -0.017           | <b>0.061</b>  | <b>-0.216</b> | <b>-0.196</b>    | <b>-0.214</b> | <b>-0.523</b>    | 0.28                                | 0.78 | 0.04     | 0.27        | 47.71    | 50.59 |       |  |
|                                        |         |                   | SE              | 0.025                            | 0.021         | 0.024        | 0.039            | 0.027         | 0.032         | 0.072            | 0.058         | 0.054            |                                     |      |          |             |          |       |       |  |
|                                        |         |                   | df              | 370                              | 370           | 370          | 373              | 373           | 373           | 375              | 375           | 376              |                                     |      |          |             |          |       |       |  |
| DJF                                    | 0.191   | 3.313             | p-value         | <b>0.018</b>                     | <b>0.000</b>  | 0.586        | 0.574            | <b>0.016</b>  | <b>0.000</b>  | <b>0.001</b>     | <b>0.000</b>  | <b>0.000</b>     |                                     |      |          |             |          |       |       |  |
|                                        |         |                   | Est.            | -0.001                           | <b>0.456</b>  | -0.027       | 0.001            | <b>0.064</b>  | <b>-0.207</b> | <b>-0.144</b>    | <b>-0.139</b> | <b>-0.190</b>    | 0.27                                | 0.78 | 0.03     | 0.04        | 45.95    | 48.73 |       |  |
|                                        |         |                   | SE              | 0.025                            | 0.018         | 0.024        | 0.039            | 0.027         | 0.027         | 0.073            | 0.051         | 0.072            |                                     |      |          |             |          |       |       |  |
| pSON                                   | 0.235   | 2.9               | df              | 370                              | 370           | 370          | 373              | 373           | 373           | 375              | 375           | 376              |                                     |      |          |             |          |       |       |  |
|                                        |         |                   | p-value         | 0.978                            | <b>0.000</b>  | 0.677        | 0.985            | <b>0.012</b>  | <b>0.000</b>  | <b>0.005</b>     | <b>0.007</b>  | <b>0.000</b>     |                                     |      |          |             |          |       |       |  |
|                                        |         |                   | Est.            | <b>-0.094</b>                    | <b>0.438</b>  | -0.030       | 0.023            | <b>0.067</b>  | <b>-0.202</b> | -0.084           | -0.101        | <b>-0.169</b>    | 0.28                                | 0.78 | 0.01     | 0.03        | 45.31    | 48.14 |       |  |
| Pan-Arctic sea ice variables           | JJA_pA  | 0.113             | 4.35            | SE                               | 0.022         | 0.019        | 0.025            | 0.034         | 0.027         | 0.029            | 0.065         | 0.054            | 0.059                               |      |          |             |          |       |       |  |
|                                        |         |                   |                 | df                               | 359           | 359          | 359              | 361           | 361           | 361              | 362           | 362              | 363                                 |      |          |             |          |       |       |  |
|                                        |         |                   |                 | p-value                          | <b>0.001</b>  | <b>0.000</b> | 0.645            | 0.440         | <b>0.009</b>  | <b>0.000</b>     | 0.779         | 0.092            | <b>0.000</b>                        |      |          |             |          |       |       |  |
|                                        | MAM_pA  | 0.147             | 3.838           | Est.                             | <b>-0.123</b> | <b>0.391</b> | -0.017           | 0.055         | <b>0.065</b>  | <b>-0.177</b>    | -0.045        | <b>-0.136</b>    | <b>-0.549</b>                       | 0.28 | 0.78     | 0.01        | 0.30     | 46.36 | 49.16 |  |
|                                        |         |                   |                 | SE                               | 0.028         | 0.021        | 0.024            | 0.043         | 0.027         | 0.032            | 0.081         | 0.060            | 0.057                               |      |          |             |          |       |       |  |
|                                        |         |                   |                 | df                               | 370           | 370          | 370              | 373           | 373           | 373              | 375           | 375              | 376                                 |      |          |             |          |       |       |  |
|                                        | DJF_pA  | 0.195             | 3.272           | p-value                          | <b>0.021</b>  | <b>0.000</b> | 0.790            | 0.066         | <b>0.009</b>  | <b>0.000</b>     | 0.457         | <b>0.025</b>     | <b>0.000</b>                        |      |          |             |          |       |       |  |
|                                        |         |                   |                 | Est.                             | -0.068        | <b>0.436</b> | -0.023           | 0.030         | <b>0.063</b>  | <b>-0.197</b>    | 0.016         | <b>-0.106</b>    | <b>-0.320</b>                       | 0.27 | 0.78     | 0.01        | 0.10     | 45.84 | 48.61 |  |
|                                        |         |                   |                 | SE                               | 0.021         | 0.019        | 0.024            | 0.031         | 0.027         | 0.028            | 0.060         | 0.053            | 0.054                               |      |          |             |          |       |       |  |
|                                        | pSON_pA | 0.16              | 3.662           | df                               | 370           | 370          | 370              | 373           | 373           | 373              | 375           | 375              | 376                                 |      |          |             |          |       |       |  |
|                                        |         |                   |                 | p-value                          | 0.147         | <b>0.000</b> | 0.726            | 0.250         | <b>0.011</b>  | <b>0.000</b>     | 0.771         | <b>0.047</b>     | <b>0.000</b>                        |      |          |             |          |       |       |  |
|                                        |         |                   |                 | Est.                             | <b>-0.131</b> | <b>0.410</b> | -0.029           | 0.016         | <b>0.066</b>  | <b>-0.201</b>    | -0.062        | -0.108           | <b>-0.344</b>                       | 0.29 | 0.78     | 0.01        | 0.12     | 45.27 | 48.09 |  |
|                                        |         | SE                | 0.022           | 0.020                            | 0.025         | 0.034        | 0.027            | 0.029         | 0.064         | 0.055            | 0.057         |                  |                                     |      |          |             |          |       |       |  |
|                                        |         | df                | 359             | 359                              | 359           | 361          | 361              | 361           | 362           | 362              | 363           |                  |                                     |      |          |             |          |       |       |  |
|                                        |         | p-value           | <b>0.006</b>    | <b>0.000</b>                     | 0.663         | 0.542        | <b>0.009</b>     | <b>0.000</b>  | 0.262         | 0.050            | <b>0.000</b>  |                  |                                     |      |          |             |          |       |       |  |
|                                        |         | Est.              | <b>-0.209</b>   | <b>0.374</b>                     | -0.016        | 0.048        | <b>0.068</b>     | <b>-0.187</b> | -0.054        | -0.108           | <b>-0.399</b> | 0.31             | 0.78                                | 0.01 | 0.16     | 45.66       | 48.51    |       |       |  |
|                                        |         | SE                | 0.025           | 0.020                            | 0.024         | 0.039        | 0.027            | 0.030         | 0.074         | 0.057            | 0.062         |                  |                                     |      |          |             |          |       |       |  |
|                                        |         | df                | 359             | 359                              | 359           | 361          | 361              | 361           | 362           | 362              | 363           |                  |                                     |      |          |             |          |       |       |  |
|                                        |         | p-value           | <b>0.000</b>    | <b>0.000</b>                     | 0.817         | 0.075        | <b>0.007</b>     | <b>0.000</b>  | 0.339         | 0.055            | <b>0.000</b>  |                  |                                     |      |          |             |          |       |       |  |

**Table S11. Piecewise SEM results for *decreasers*.** Linear mixed effect (LME) models for RWI, summer (June-to-August, JJA) SPEI, temperature and precipitation were implemented into each SEM with a random intercept for a site included in each model. Models were run for period (1979-2008), except for previous year sea ice variables (i.e. pLRD, pFAD, DJF, pSON, DJF\_pA, pSON\_pA) for which we lack measurements for year 1979. For the source data and the abbreviations, see Table S9.

| Sea ice variable included in the model |         | <i>decreasers</i> |                  |                                  |               |                  |              |               |                  |               |                  |               | R <sup>2</sup> endogenous variables |      |          |             |          |       |       |  |
|----------------------------------------|---------|-------------------|------------------|----------------------------------|---------------|------------------|--------------|---------------|------------------|---------------|------------------|---------------|-------------------------------------|------|----------|-------------|----------|-------|-------|--|
|                                        |         | p-value           | Fisher's C test  | Standardized parameter estimates |               |                  |              |               |                  |               |                  |               |                                     | RWI  | SPEI JJA | PRECI P JJA | TEMP JJA | AIC   | AICc  |  |
|                                        |         |                   |                  | RWI                              |               | SPEI JJA         |              |               | PRECIP JJA       |               | TEMP JJA         |               |                                     |      |          |             |          |       |       |  |
| Variable code                          |         |                   | Sea ice variable | TEMP JJA                         | SPEI JJA      | Sea ice variable | PRECIP JJA   | TEMP JJA      | Sea ice variable | TEMP JJA      | Sea ice variable |               |                                     |      |          |             |          |       |       |  |
| regional sea ice variables             | LRD     | 0.495             | 1.405            | Est.                             | 0.130         | 0.127            | <b>0.235</b> | <b>0.075</b>  | <b>0.241</b>     | <b>-0.110</b> | -0.045           | -0.060        | <b>-0.528</b>                       | 0.10 | 0.76     | 0.00        | 0.28     | 43.41 | 47.30 |  |
|                                        |         |                   |                  | SE                               | 0.026         | 0.024            | 0.053        | 0.019         | 0.015            | 0.018         | 0.077            | 0.072         | 0.056                               |      |          |             |          |       |       |  |
|                                        |         |                   |                  | df                               | 255           | 255              | 255          | 258           | 258              | 258           | 259              | 259           | 260                                 |      |          |             |          |       |       |  |
|                                        | pLRD    | 0.472             | 1.501            | p-value                          | 0.067         | 0.070            | <b>0.002</b> | <b>0.042</b>  | <b>0.000</b>     | <b>0.003</b>  | 0.537            | 0.405         | <b>0.000</b>                        | 0.09 | 0.85     | 0.00        | 0.05     | 43.50 | 47.56 |  |
|                                        |         |                   |                  | Est.                             | <b>0.134</b>  | 0.076            | <b>0.190</b> | <b>0.066</b>  | <b>0.216</b>     | <b>-0.191</b> | -0.016           | -0.066        | <b>-0.235</b>                       |      |          |             |          |       |       |  |
|                                        |         |                   |                  | SE                               | 0.023         | 0.022            | 0.059        | 0.013         | 0.012            | 0.012         | 0.070            | 0.066         | 0.064                               |      |          |             |          |       |       |  |
|                                        | pFAD    | 0.588             | 1.061            | df                               | 246           | 246              | 246          | 249           | 249              | 249           | 250              | 250           | 251                                 |      |          |             |          |       |       |  |
|                                        |         |                   |                  | p-value                          | <b>0.034</b>  | 0.234            | <b>0.018</b> | <b>0.013</b>  | <b>0.000</b>     | <b>0.000</b>  | 0.807            | 0.302         | <b>0.000</b>                        | 0.14 | 0.85     | 0.01        | 0.04     | 43.06 | 47.08 |  |
|                                        |         |                   |                  | Est.                             | <b>-0.282</b> | 0.092            | 0.147        | <b>-0.096</b> | <b>0.208</b>     | <b>-0.188</b> | -0.077           | -0.047        | <b>0.201</b>                        |      |          |             |          |       |       |  |
|                                        | JJA     | 0.401             | 1.83             | SE                               | 0.023         | 0.021            | 0.060        | 0.013         | 0.011            | 0.012         | 0.070            | 0.065         | 0.065                               |      |          |             |          |       |       |  |
|                                        |         |                   |                  | df                               | 246           | 246              | 246          | 249           | 249              | 249           | 250              | 250           | 251                                 |      |          |             |          |       |       |  |
|                                        |         |                   |                  | p-value                          | <b>0.000</b>  | 0.134            | 0.070        | <b>0.000</b>  | <b>0.000</b>     | <b>0.000</b>  | 0.224            | 0.459         | <b>0.001</b>                        | 0.10 | 0.76     | 0.01        | 0.22     | 43.83 | 47.77 |  |
| MAM                                    | 0.309   | 2.347             | Est.             | <b>0.146</b>                     | 0.098         | <b>0.234</b>     | 0.035        | <b>0.244</b>  | <b>-0.140</b>    | -0.154        | -0.079           | <b>-0.274</b> | 0.11                                | 0.75 | 0.02     | 0.08        | 44.35    | 48.33 |       |  |
|                                        |         |                   | SE               | 0.029                            | 0.021         | 0.053            | 0.022        | 0.015         | 0.016            | 0.086         | 0.063            | 0.080         |                                     |      |          |             |          |       |       |  |
|                                        |         |                   | df               | 255                              | 255           | 255              | 258          | 258           | 258              | 259           | 259              | 260           |                                     |      |          |             |          |       |       |  |
| DJF                                    | 0.522   | 1.3               | p-value          | <b>0.020</b>                     | 0.114         | <b>0.002</b>     | 0.292        | <b>0.000</b>  | <b>0.000</b>     | <b>0.015</b>  | 0.211            | <b>0.000</b>  | 0.10                                | 0.84 | 0.01     | 0.03        | 43.30    | 47.34 |       |  |
|                                        |         |                   | Est.             | <b>0.176</b>                     | 0.070         | <b>0.173</b>     | 0.020        | <b>0.214</b>  | <b>-0.203</b>    | 0.045         | -0.055           | <b>-0.165</b> |                                     |      |          |             |          |       |       |  |
|                                        |         |                   | SE               | 0.027                            | 0.022         | 0.060            | 0.016        | 0.012         | 0.012            | 0.082         | 0.065            | 0.077         |                                     |      |          |             |          |       |       |  |
| pSON                                   | 0.777   | 0.504             | df               | 246                              | 246           | 246              | 249          | 249           | 249              | 250           | 250              | 251           |                                     |      |          |             |          |       |       |  |
|                                        |         |                   | p-value          | <b>0.006</b>                     | 0.264         | <b>0.033</b>     | 0.451        | <b>0.000</b>  | <b>0.000</b>     | 0.478         | 0.382            | <b>0.008</b>  | 0.15                                | 0.85 | 0.02     | 0.03        | 42.50    | 46.47 |       |  |
|                                        |         |                   | Est.             | <b>0.297</b>                     | 0.085         | 0.151            | <b>0.088</b> | <b>0.204</b>  | <b>-0.193</b>    | 0.118         | -0.043           | <b>-0.165</b> |                                     |      |          |             |          |       |       |  |
| Pan-Arctic sea ice variables           | JJA_pA  | 0.892             | 0.229            | SE                               | 0.026         | 0.021            | 0.059        | 0.015         | 0.011            | 0.012         | 0.081            | 0.065         | 0.077                               |      |          |             |          |       |       |  |
|                                        |         |                   |                  | df                               | 246           | 246              | 246          | 249           | 249              | 249           | 250              | 250           | 251                                 |      |          |             |          |       |       |  |
|                                        |         |                   |                  | p-value                          | <b>0.000</b>  | 0.160            | 0.061        | <b>0.001</b>  | <b>0.000</b>     | <b>0.000</b>  | 0.061            | 0.492         | <b>0.008</b>                        | 0.28 | 0.77     | 0.02        | 0.14     | 42.23 | 46.02 |  |
|                                        | MAM_pA  | 0.952             | 0.099            | Est.                             | <b>0.502</b>  | <b>0.223</b>     | 0.109        | <b>0.136</b>  | <b>0.220</b>     | <b>-0.099</b> | <b>0.164</b>     | 0.025         | <b>-0.377</b>                       | 0.32 | 0.76     | 0.02        | 0.06     | 42.10 | 45.88 |  |
|                                        |         |                   |                  | SE                               | 0.027         | 0.019            | 0.051        | 0.022         | 0.015            | 0.016         | 0.088            | 0.065         | 0.076                               |      |          |             |          |       |       |  |
|                                        |         |                   |                  | df                               | 255           | 255              | 255          | 258           | 258              | 258           | 259              | 259           | 260                                 |      |          |             |          |       |       |  |
|                                        | DJF_pA  | 0.421             | 1.732            | p-value                          | <b>0.000</b>  | <b>0.000</b>     | 0.130        | <b>0.000</b>  | <b>0.000</b>     | <b>0.003</b>  | <b>0.013</b>     | 0.699         | <b>0.000</b>                        | 0.29 | 0.85     | 0.05        | 0.03     | 43.73 | 47.81 |  |
|                                        |         |                   |                  | Est.                             | <b>0.514</b>  | <b>0.169</b>     | <b>0.138</b> | <b>0.094</b>  | <b>0.228</b>     | <b>-0.126</b> | 0.122            | -0.006        | <b>-0.251</b>                       |      |          |             |          |       |       |  |
|                                        |         |                   |                  | SE                               | 0.021         | 0.018            | 0.049        | <b>0.017</b>  | <b>0.015</b>     | 0.015         | 0.070            | 0.063         | 0.066                               |      |          |             |          |       |       |  |
|                                        | pSON_pA | 0.525             | 1.288            | df                               | 255           | 255              | 255          | 258           | 258              | 258           | 259              | 259           | 260                                 |      |          |             |          |       |       |  |
|                                        |         |                   |                  | p-value                          | <b>0.000</b>  | <b>0.002</b>     | <b>0.049</b> | <b>0.004</b>  | <b>0.000</b>     | <b>0.000</b>  | 0.052            | 0.926         | <b>0.000</b>                        | 0.28 | 0.85     | 0.05        | 0.03     | 43.29 | 47.32 |  |
|                                        |         |                   |                  | Est.                             | <b>0.490</b>  | 0.108            | 0.095        | <b>0.063</b>  | <b>0.202</b>     | <b>-0.196</b> | <b>0.211</b>     | -0.025        | <b>-0.175</b>                       |      |          |             |          |       |       |  |
|                                        |         | SE                | 0.022            | 0.019                            | 0.057         | 0.014            | 0.012        | 0.012         | 0.074            | 0.064         | 0.071            |               |                                     |      |          |             |          |       |       |  |
|                                        |         | df                | 246              | 246                              | 246           | 249              | 249          | 249           | 250              | 250           | 251              |               |                                     |      |          |             |          |       |       |  |
|                                        |         | p-value           | <b>0.000</b>     | 0.053                            | 0.224         | <b>0.018</b>     | <b>0.000</b> | <b>0.000</b>  | <b>0.001</b>     | 0.681         | <b>0.005</b>     |               |                                     |      |          |             |          |       |       |  |
|                                        |         | Est.              | <b>0.477</b>     | 0.095                            | 0.077         | <b>0.084</b>     | <b>0.197</b> | <b>-0.194</b> | <b>0.217</b>     | -0.028        | <b>-0.159</b>    |               |                                     |      |          |             |          |       |       |  |
|                                        |         | SE                | 0.026            | 0.019                            | 0.058         | 0.016            | 0.012        | 0.012         | 0.083            | 0.063         | 0.080            |               |                                     |      |          |             |          |       |       |  |
|                                        |         | df                | 246              | 246                              | 246           | 249              | 249          | 249           | 250              | 250           | 251              |               |                                     |      |          |             |          |       |       |  |
|                                        |         | p-value           | <b>0.000</b>     | 0.094                            | 0.327         | <b>0.001</b>     | <b>0.000</b> | <b>0.000</b>  | <b>0.001</b>     | 0.649         | <b>0.010</b>     |               |                                     |      |          |             |          |       |       |  |

**Table S12. Parameter estimates ( $\beta$ ) for sea ice predictors with associated 95% confidence intervals from top ranked linear mixed-effect models for *increasers (top)* and *decreasers (bottom)* in the study period 1980-2008. Model parameter estimates were calculated using maximum likelihood method. Response variable is represented by all shrubs mean ring width index (RWI) after dRCS detrending and square root transformation. Random intercept of a shrub (n=363 *increasers* and n=251 *decreasers*) nested within a site (n=13 *increasers* and n=9 *decreasers*; i.e. six geographic locations for nine *decreasers* chronologies) was included to each model. SE - standard error; df - number of pairs tested; sd - standard deviation for random effects; R<sup>2</sup>m - marginal R<sup>2</sup>; R<sup>2</sup>c - conditional R<sup>2</sup>; AICc - Akaike's information criteria with small sample bias adjustment. Nonsignificant relationships are marked in grey font. For the source data and the abbreviations, see Table S9.**

| <i>increasers</i> |           |         |          |          |       |       |         |          |                      |                 |      |       |        |                      |                      |                  |                  |
|-------------------|-----------|---------|----------|----------|-------|-------|---------|----------|----------------------|-----------------|------|-------|--------|----------------------|----------------------|------------------|------------------|
| model             | Intercept | $\beta$ | lower CI | upper CI | SE    | df    | t-value | sd: Site | sd: Shrub<br>in Site | sd:<br>Residual | AICc | delta | weight | predictor<br>p-value | Intercept<br>p-value | R <sup>2</sup> m | R <sup>2</sup> c |
| JJA               | 0.977     | -0.061  | -0.069   | -0.053   | 0.004 | 10870 | -15.1   | 0.046    | 0.172                | 0.341           | 6505 | 0     | 1      | 0.000                | 0.000                | 0.017            | 0.229            |
| pSON_pA           | 0.985     | -0.071  | -0.082   | -0.061   | 0.005 | 10870 | -13.5   | 0.047    | 0.171                | 0.343           | 6549 | 45    | 0      | 0.000                | 0.000                | 0.018            | 0.225            |
| LRD               | 0.973     | -0.043  | -0.049   | -0.036   | 0.003 | 10870 | -12.5   | 0.046    | 0.173                | 0.343           | 6574 | 70    | 0      | 0.000                | 0.000                | 0.011            | 0.222            |
| pSON              | 0.975     | -0.045  | -0.054   | -0.037   | 0.004 | 10870 | -10.6   | 0.046    | 0.172                | 0.344           | 6618 | 114   | 0      | 0.000                | 0.000                | 0.009            | 0.219            |
| JJA_pA            | 0.981     | -0.057  | -0.068   | -0.046   | 0.006 | 10870 | -10.3   | 0.046    | 0.171                | 0.345           | 6622 | 117   | 0      | 0.000                | 0.000                | 0.011            | 0.217            |
| pFAD              | 0.972     | 0.025   | 0.017    | 0.032    | 0.004 | 10870 | 6.6     | 0.046    | 0.173                | 0.345           | 6685 | 180   | 0      | 0.000                | 0.000                | 0.003            | 0.215            |
| DJF_pA            | 0.974     | -0.031  | -0.041   | -0.021   | 0.005 | 10870 | -6.0    | 0.046    | 0.172                | 0.346           | 6692 | 188   | 0      | 0.000                | 0.000                | 0.004            | 0.213            |
| pLRD              | 0.97      | -0.017  | -0.023   | -0.010   | 0.003 | 10870 | -4.9    | 0.046    | 0.173                | 0.346           | 6704 | 199   | 0      | 0.000                | 0.000                | 0.002            | 0.213            |
| DJF               | 0.969     | -0.016  | -0.026   | -0.007   | 0.005 | 10870 | -3.3    | 0.046    | 0.173                | 0.347           | 6716 | 211   | 0      | 0.001                | 0.000                | 0.001            | 0.211            |
| MAM               | 0.968     | -0.010  | -0.020   | -0.001   | 0.005 | 10870 | -2.1    | 0.046    | 0.173                | 0.348           | 6722 | 218   | 0      | 0.000                | 0.034                | 0.000            | 0.210            |
| null model        | 0.967     | n.a.    | 0.934    | 1.000    | 0.017 | 10871 | 57.1    | 0.046    | 0.173                | 0.348           | 6725 | 220   | 0      | n.a.                 | 0.000                | 0.000            | 0.210            |
| MAM_pA            | 0.967     | -0.002  | -0.011   | 0.007    | 0.005 | 10870 | -0.4    | 0.046    | 0.173                | 0.348           | 6727 | 222   | 0      | 0.681                | 0.000                | 0.000            | 0.210            |
| <i>decreasers</i> |           |         |          |          |       |       |         |          |                      |                 |      |       |        |                      |                      |                  |                  |
| model             | Intercept | $\beta$ | lower CI | upper CI | SE    | df    | t-value | sd: Site | sd: Shrub<br>in Site | sd:<br>Residual | AICc | delta | weight | predictor<br>p-value | Intercept<br>p-value | R <sup>2</sup> m | R <sup>2</sup> c |
| DJF_pA            | 0.933     | 0.076   | 0.065    | 0.087    | 0.006 | 7558  | 13.3    | 0.024    | 0.152                | 0.308           | 2175 | 0     | 1      | 0.000                | 0.000                | 0.031            | 0.225            |
| MAM_pA            | 0.943     | 0.058   | 0.048    | 0.069    | 0.005 | 7558  | 11.3    | 0.027    | 0.151                | 0.310           | 2220 | 45    | 0      | 0.000                | 0.000                | 0.019            | 0.211            |
| pSON_pA           | 0.933     | 0.068   | 0.056    | 0.079    | 0.006 | 7558  | 11.2    | 0.024    | 0.150                | 0.311           | 2221 | 46    | 0      | 0.000                | 0.000                | 0.019            | 0.209            |
| pSON              | 0.943     | 0.027   | 0.018    | 0.035    | 0.004 | 7558  | 6.2     | 0.033    | 0.143                | 0.317           | 2299 | 124   | 0      | 0.000                | 0.000                | 0.004            | 0.181            |
| JJA_pA            | 0.94      | 0.040   | 0.028    | 0.052    | 0.006 | 7558  | 6.5     | 0.028    | 0.147                | 0.314           | 2299 | 124   | 0      | 0.000                | 0.000                | 0.006            | 0.191            |
| MAM               | 0.946     | 0.019   | 0.009    | 0.029    | 0.005 | 7558  | 3.9     | 0.031    | 0.141                | 0.319           | 2321 | 147   | 0      | 0.000                | 0.000                | 0.002            | 0.172            |
| pFAD              | 0.945     | -0.014  | -0.021   | -0.006   | 0.004 | 7558  | -3.5    | 0.032    | 0.142                | 0.318           | 2324 | 150   | 0      | 0.001                | 0.000                | 0.001            | 0.174            |
| DJF               | 0.948     | 0.016   | 0.007    | 0.026    | 0.005 | 7558  | 3.3     | 0.029    | 0.142                | 0.319           | 2325 | 151   | 0      | 0.001                | 0.000                | 0.001            | 0.171            |
| JJA               | 0.946     | 0.013   | 0.005    | 0.021    | 0.004 | 7558  | 3.2     | 0.032    | 0.142                | 0.319           | 2326 | 151   | 0      | 0.001                | 0.000                | 0.001            | 0.172            |
| LRD               | 0.946     | 0.008   | 0.001    | 0.015    | 0.004 | 7558  | 2.2     | 0.033    | 0.141                | 0.319           | 2332 | 157   | 0      | 0.029                | 0.029                | 0.000            | 0.171            |
| null model        | 0.947     | n.a.    | 0.916    | 0.978    | 0.016 | 7559  | 59.8    | 0.033    | 0.140                | 0.320           | 2334 | 160   | 0      | 0.000                | n.a.                 | 0.000            | 0.169            |
| pLRD              | 0.948     | -0.001  | -0.008   | 0.006    | 0.004 | 7558  | -0.3    | 0.033    | 0.140                | 0.320           | 2336 | 162   | 0      | 0.750                | 0.000                | 0.000            | 0.168            |



**Table S13. Comparison of best sea ice versus best overall linear mixed effect (LME) models fitted to each site separately using all shrubs (n=19,061 ring-width values in total), instead of chronologies, for common period (1980-2008) per site and species.** A random intercept for year was included in each model. Response variable was represented by RWI after dRCS detrending and square root transformation. See Table S9 for full names of predictors used in LME models. SE - standard error;  $\Delta$ AIC - difference between a null model and best model for each site;  $R^2_m$  - marginal  $R^2$ ;  $R^2_c$  - conditional  $R^2$ . All predictor variables were transformed to z-scores prior the analysis. Grey font indicates nonsignificant models.

| Chronology ID | Responder | Species                   | # shrubs | Best sea ice MODEL | $\Delta$ AIC | $\beta$ | SE    | p-value | $R^2_m$ | $R^2_c$ | Best MODEL | $\Delta$ AIC | $\beta$ | SE    | p-value | $R^2_m$ | $R^2_c$ |
|---------------|-----------|---------------------------|----------|--------------------|--------------|---------|-------|---------|---------|---------|------------|--------------|---------|-------|---------|---------|---------|
| AF_SAR        | increaser | <i>Salix arctica</i>      | 29       | pSON_pA            | 3            | -0.071  | 0.031 | 0.030   | 0.03    | 0.14    | SPEI_JJA   | 8            | -0.151  | 0.043 | 0.002   | 0.05    | 0.14    |
| BL_BGL        | decreaser | <i>Betula glandulosa</i>  | 44       | MAM_pA             | 15           | 0.120   | 0.025 | 0.000   | 0.09    | 0.21    | MAM_pA     | 15           | 0.120   | 0.025 | 0.000   | 0.09    | 0.21    |
| BS_BGL        | increaser | <i>Betula glandulosa</i>  | 39       | pSON_pA            | 20           | -0.242  | 0.042 | 0.000   | 0.19    | 0.32    | pSON_pA    | 20           | -0.242  | 0.042 | 0.000   | 0.19    | 0.32    |
| BT_BGL        | increaser | <i>Betula glandulosa</i>  | 76       | JJA                | 10           | -0.159  | 0.042 | 0.001   | 0.11    | 0.32    | JJA        | 10           | -0.159  | 0.042 | 0.001   | 0.11    | 0.32    |
| DE_SGL        | decreaser | <i>Salix glauca</i>       | 15       | pSON_pA            | 13           | 0.102   | 0.023 | 0.000   | 0.07    | 0.09    | pSON_pA    | 13           | 0.102   | 0.023 | 0.000   | 0.07    | 0.09    |
| DK_BNA        | increaser | <i>Betula nana</i>        | 15       | DJF                | 13           | -0.135  | 0.031 | 0.000   | 0.12    | 0.28    | DJF        | 13           | -0.135  | 0.031 | 0.000   | 0.12    | 0.28    |
| EB_SPO        | increaser | <i>Salix polaris</i>      | 10       | JJA_pA             | 2            | -0.112  | 0.055 | 0.052   | 0.04    | 0.24    | TEMP_JJA   | 11           | 0.147   | 0.019 | 0.000   | 0.11    | 0.24    |
| GR_BGL        | increaser | <i>Betula glandulosa</i>  | 17       | DJF_pA             | 10           | -0.093  | 0.023 | 0.000   | 0.08    | 0.16    | DJF_pA     | 10           | -0.093  | 0.023 | 0.000   | 0.08    | 0.16    |
| HE_SAR        | decreaser | <i>Salix arctica</i>      | 24       | JJA_pA             | 18           | 0.229   | 0.044 | 0.000   | 0.09    | 0.09    | JJA_pA     | 18           | 0.229   | 0.044 | 0.000   | 0.09    | 0.09    |
| HE_SRI        | decreaser | <i>Salix richardsonii</i> | 17       | DJF_pA             | 27           | 0.126   | 0.019 | 0.000   | 0.08    | 0.08    | DJF_pA     | 27           | 0.126   | 0.019 | 0.000   | 0.08    | 0.08    |
| KG_BNA        | decreaser | <i>Betula nana</i>        | 42       | DJF_pA             | 10           | 0.105   | 0.028 | 0.001   | 0.07    | 0.21    | DJF_pA     | 10           | 0.105   | 0.028 | 0.001   | 0.07    | 0.21    |
| KG_SGL        | decreaser | <i>Salix glauca</i>       | 32       | DJF_pA             | 7            | 0.087   | 0.027 | 0.003   | 0.05    | 0.14    | DJF_pA     | 7            | 0.087   | 0.027 | 0.003   | 0.05    | 0.14    |
| KY_BNA        | decreaser | <i>Betula nana</i>        | 19       | MAM_pA             | 7            | 0.075   | 0.024 | 0.004   | 0.04    | 0.11    | MAM_pA     | 7            | 0.075   | 0.024 | 0.004   | 0.04    | 0.11    |
| KY_SPU        | decreaser | <i>Salix pulchra</i>      | 19       | not sig.           | 0            | n.a.    | n.a.  | n.a.    | n.a.    | n.a.    | not sig.   | 0            | n.a.    | n.a.  | n.a.    | n.a.    | n.a.    |
| LA_SAR        | increaser | <i>Salix arctica</i>      | 19       | pSON               | 3            | -0.155  | 0.070 | 0.035   | 0.05    | 0.33    | SPEI_JJA   | 7            | -0.199  | 0.062 | 0.003   | 0.10    | 0.33    |
| LB_SRI        | increaser | <i>Salix lanata</i>       | 29       | MAM_pA             | 8            | -0.109  | 0.031 | 0.002   | 0.09    | 0.22    | TEMP_JJA   | 30           | 0.127   | 0.008 | 0.000   | 0.20    | 0.22    |
| PL_SAR        | increaser | <i>Salix arctica</i>      | 10       | pSON_pA            | 3            | -0.091  | 0.038 | 0.024   | 0.03    | 0.11    | pSON_pA    | 3            | -0.091  | 0.038 | 0.024   | 0.03    | 0.11    |
| RE_SAR        | increaser | <i>Salix arctica</i>      | 31       | not sig.           | 0            | n.a.    | n.a.  | n.a.    | n.a.    | n.a.    | PRECIP_JJA | 4            | -0.068  | 0.014 | 0.000   | 0.02    | 0.10    |
| TL_BNA        | increaser | <i>Betula nana</i>        | 29       | LRD                | 6            | -0.083  | 0.028 | 0.006   | 0.04    | 0.12    | TEMP_JJA   | 15           | 0.094   | 0.011 | 0.000   | 0.07    | 0.12    |
| UM_BGL        | increaser | <i>Betula glandulosa</i>  | 25       | LRD                | 7            | -0.063  | 0.020 | 0.003   | 0.03    | 0.07    | TEMP_JJA   | 8            | 0.054   | 0.010 | 0.000   | 0.04    | 0.07    |
| VA_SRI        | decreaser | <i>Salix lanata</i>       | 39       | pSON               | 5            | 0.126   | 0.045 | 0.010   | 0.11    | 0.44    | TEMP_JJA   | 16           | 0.145   | 0.007 | 0.000   | 0.23    | 0.44    |
| ZA_SAR        | increaser | <i>Salix arctica</i>      | 34       | LRD50              | 2            | -0.039  | 0.020 | 0.063   | 0.01    | 0.05    | TEMP_JJA   | 1            | 0.034   | 0.011 | 0.003   | 0.01    | 0.05    |

**Table S14. Linear mixed-effect models for double detrended series.** Parameter estimates ( $\beta$ ) with their associated 95% confidence intervals for linear mixed-effect (LME) models for *increasers* (top) and *decreasers* (bottom) fitted to each responder group using all shrubs, instead of chronologies for common period (1980-2008), and double detrended series (both RWI for each shrub and sea ice-related predictors time-series). A random intercept for a site was included in each model. For the source data and the abbreviations, see Table S9. SE - standard error; AICc - Akaike's information criteria with small sample bias adjustment; R<sup>2</sup>m - marginal R<sup>2</sup>; R<sup>2</sup>c - conditional R<sup>2</sup>. Not significant values are marked in grey italics. Note various number of df (i.e., pairs tested) within each model, as a results of AR detrending where some series were shortened. Therefore, model rank should be taken with caution.

| <i>increasers</i> |           |         |          |          |       |       |         |          |              |       |       |        |                   |                   |                  |                  |
|-------------------|-----------|---------|----------|----------|-------|-------|---------|----------|--------------|-------|-------|--------|-------------------|-------------------|------------------|------------------|
| model             | Intercept | $\beta$ | lower CI | upper CI | SE    | df    | t-value | sd: Site | sd: Residual | AICc  | delta | weight | predictor p-value | Intercept p-value | R <sup>2</sup> m | R <sup>2</sup> c |
| pFAD              | 0.006     | 0.041   | 0.010    | 0.071    | 0.015 | 10215 | 2.6     | 0.000    | 0.980        | 26454 | 0     | 1      | 0.009             | 0.699             | 0.002            | 0.002            |
| pSON              | -0.003    | -0.041  | -0.072   | -0.010   | 0.016 | 10354 | -2.6    | 0.000    | 0.982        | 26822 | 369   | 0      | 0.010             | 0.864             | 0.002            | 0.002            |
| pLRD              | 0.001     | -0.019  | -0.048   | 0.010    | 0.015 | 10423 | -1.3    | 0.000    | 0.982        | 27008 | 555   | 0      | 0.199             | 0.958             | 0.000            | 0.000            |
| DJF               | 0.004     | -0.008  | -0.037   | 0.021    | 0.015 | 10662 | -0.5    | 0.000    | 0.979        | 27618 | 1164  | 0      | 0.587             | 0.797             | 0.000            | 0.000            |
| pSON_pA           | -0.005    | -0.110  | -0.139   | -0.081   | 0.015 | 10692 | -7.4    | 0.000    | 0.973        | 27625 | 1172  | 0      | 0.000             | 0.718             | 0.012            | 0.012            |
| JJA_pA            | -0.002    | -0.074  | -0.103   | -0.046   | 0.015 | 10692 | -5.1    | 0.000    | 0.976        | 27654 | 1200  | 0      | 0.000             | 0.885             | 0.006            | 0.006            |
| LRD               | 0.01      | -0.119  | -0.147   | -0.090   | 0.014 | 10708 | -8.2    | 0.000    | 0.972        | 27670 | 1217  | 0      | 0.000             | 0.516             | 0.014            | 0.014            |
| DJF_pA            | 0.002     | 0.012   | -0.018   | 0.041    | 0.015 | 10692 | 0.8     | 0.000    | 0.979        | 27679 | 1226  | 0      | 0.431             | 0.899             | 0.000            | 0.000            |
| JJA               | -0.006    | -0.099  | -0.129   | -0.070   | 0.015 | 10737 | -6.7    | 0.000    | 0.975        | 27788 | 1335  | 0      | 0.000             | 0.708             | 0.009            | 0.009            |
| MAM               | 0.004     | 0.013   | -0.016   | 0.042    | 0.015 | 10730 | 0.9     | 0.000    | 0.981        | 27834 | 1381  | 0      | 0.384             | 0.811             | 0.000            | 0.000            |
| MAM_pA            | 0.006     | 0.072   | 0.044    | 0.100    | 0.014 | 10821 | 5.0     | 0.000    | 0.979        | 28079 | 1625  | 0      | 0.000             | 0.679             | 0.005            | 0.005            |
| null model        | 0.003     | n.a.    | -0.027   | 0.032    | 0.015 | 10822 | 0.2     | 0.000    | 0.982        | 28102 | 1648  | 0      | n.a.              | 0.859             | 0.000            | 0.000            |
| <i>decreasers</i> |           |         |          |          |       |       |         |          |              |       |       |        |                   |                   |                  |                  |
| model             | Intercept | $\beta$ | lower CI | upper CI | SE    | df    | t-value | sd: Site | sd: Residual | AICc  | delta | weight | predictor p-value | Intercept p-value | R <sup>2</sup> m | R <sup>2</sup> c |
| pFAD              | -0.007    | 0.023   | -0.011   | 0.058    | 0.018 | 7105  | 1.3     | 0.000    | 0.966        | 18390 | 0     | 1      | 0.189             | 0.686             | 0.001            | 0.001            |
| pLRD              | 0.001     | -0.015  | -0.048   | 0.017    | 0.017 | 7242  | -0.9    | 0.000    | 0.972        | 18861 | 471   | 0      | 0.361             | 0.945             | 0.000            | 0.000            |
| pSON              | 0.000     | 0.047   | 0.012    | 0.081    | 0.018 | 7309  | 2.7     | 0.000    | 0.974        | 19063 | 672   | 0      | 0.008             | 0.985             | 0.002            | 0.002            |
| LRD               | -0.001    | 0.008   | -0.024   | 0.041    | 0.017 | 7459  | 0.5     | 0.000    | 0.979        | 19539 | 1149  | 0      | 0.617             | 0.953             | 0.000            | 0.000            |
| JJA               | 0.005     | 0.079   | 0.046    | 0.112    | 0.017 | 7471  | 4.7     | 0.000    | 0.977        | 19559 | 1169  | 0      | 0.000             | 0.786             | 0.006            | 0.006            |
| DJF_pA            | 0.006     | 0.095   | 0.061    | 0.129    | 0.017 | 7481  | 5.5     | 0.000    | 0.974        | 19601 | 1211  | 0      | 0.000             | 0.706             | 0.009            | 0.009            |
| pSON_pA           | 0.006     | 0.089   | 0.055    | 0.123    | 0.017 | 7481  | 5.1     | 0.000    | 0.974        | 19605 | 1215  | 0      | 0.000             | 0.717             | 0.007            | 0.007            |
| JJA_pA            | 0.002     | 0.006   | -0.027   | 0.039    | 0.017 | 7481  | 0.4     | 0.000    | 0.978        | 19631 | 1241  | 0      | 0.714             | 0.907             | 0.000            | 0.000            |
| MAM               | 0.001     | 0.038   | 0.006    | 0.071    | 0.017 | 7481  | 2.3     | 0.000    | 0.981        | 19650 | 1260  | 0      | 0.022             | 0.955             | 0.002            | 0.002            |
| DJF               | 0.007     | 0.022   | -0.012   | 0.055    | 0.017 | 7504  | 1.3     | 0.000    | 0.980        | 19714 | 1323  | 0      | 0.204             | 0.704             | 0.000            | 0.000            |
| MAM_pA            | 0.008     | 0.109   | 0.077    | 0.142    | 0.017 | 7534  | 6.6     | 0.000    | 0.976        | 19772 | 1381  | 0      | 0.000             | 0.620             | 0.012            | 0.012            |
| null model        | 0.002     | n.a.    | -0.032   | 0.036    | 0.017 | 7535  | 0.1     | 0.000    | 0.983        | 19813 | 1422  | 0      | n.a.              | 0.887             | 0.000            | 0.000            |

## SI References:

1. N. Boulanger-Lapointe, E. Lévesque, S. Boudreau, G. Henry, N. Schmidt, Population structure and dynamics of Arctic willow (*Salix arctica*) in the High Arctic. *J. Biogeogr.* **41**, 1967-1978, (2014).
2. P. Ropars, E. Lévesque, S. Boudreau, S. How do climate and topography influence the greening of the forest-tundra ecotone in northern Quebec? A dendrochronological analysis of *Betula*. *J. Ecol.* **103**, 679-690 (2015).
3. I. H. Myers-Smith *et al.*, Climate sensitivity of shrub growth across the tundra biome. *Nat. Clim. Change* **5**, 887-891 (2015).
4. J. Hollesen, A. Buchwal, G. Rachlewicz, B. U. Hansen, M. O. Hansen, O. Stecher, B. Elberling, Winter warming as an important co-driver for *Betula nana* growth in Western Greenland during the past century. *Glob. Change Biol.* **21**, 2410-2423 (2015).
5. A. Buchwal, G. Rachlewicz, P. Fonti, P. Cherubini, H. Gärtner, Temperature modulates intra-plant growth of *Salix polaris* from a high Arctic site (Svalbard). *Polar Biol.* **36**, 1305-1318 (2013).
6. C. M. Gamm, P. F. Sullivan, A. Buchwal, R. J. Dial, A. B. Young, D. A. Watts, S. M. P. Cahoon, J. M. Welker, E. Post, Declining growth of deciduous shrubs in the warming climate of continental western Greenland. *J. Ecol.* **106**, 640-654 (2018).
7. D. Blok, U. Sass-Klaassen, G. Schaepman-Strub, M.M.P.D. Heijmans, P. Sauren, F. Berendse, What are the main climate drivers for shrub growth in Northeastern Siberian tundra? *Biogeosciences* **8**, 1169-1179 (2011).
8. M. Macias-Fauria, B. C. Forbes, P. Zetterberg, P., T. Kumpula, Eurasian Arctic greening reveals teleconnections and the potential for structurally novel ecosystems. *Nat. Clim. Change* **2**, 613-618 (2012).
9. A. Buchwal, S. Weijers, D. Blok, B. Elberling, Temperature sensitivity of willow dwarf shrub growth from two distinct High Arctic sites. *Inter. J. Biometeorol.* **63**, 167-181 (2019).
10. B. C. Forbes, M. Macias-Fauria, P. Zetterberg, P. Russian Arctic warming and 'greening' are closely tracked by tundra shrub willows. *Glob. Change Biol.* **16**, 1542-1554 (2010).
11. P. F. Sullivan, A. Z. Csank, Contrasting sampling designs among archived datasets: implications for synthesis efforts. *Tree Physiol.* **36**, 1057-1059 (2016).
12. J. C. Stroeve, A. D. Crawford, S. Stammerjohn, Using timing of ice retreat to predict timing of fall freeze-up in the Arctic. *Geophys. Res. Lett.* **43**, 6332-6340 (2016).
13. S. M. Vicente-Serrano, S. Beguería, J. I. López-Moreno, A Multi-scalar drought index sensitive to global warming: The Standardized Precipitation Evapotranspiration Index - SPEI. *J. Clim.* **23**, 1696 (2010).
14. S. Beguería, S. M. Vicente-Serrano, SPEI: Calculation of the standardised precipitation-evapotranspiration index. Version 1.7, R package. <http://cran.r-project.org/web/packages/SPEI/index.html> (2017).
