# Supplementary material for: Divergence of Arctic shrub growth associated with sea ice decline
Source: PubMed Central journal article supplement (PMC7776857; doi:10.1073/pnas.2013311117), 2020-12-14
Supplement: pnas.2013311117.sd01.pdf [file pnas.2013311117.sd01.pdf]

```
### This file presents an example code used for the analyses performed in the ICY SHRUB synthesis:
```

```
### Buchwal et al. (26 June 2020 - submission date):
```

```
### Article Title: Divergence of Arctic shrub growth associated with sea ice decline
```

```
install.packages("dplR")  
library(dplR)  
install.packages("treeclim")  
library(treeclim)
```

```
install.packages("nlme")  
library(nlme)  
install.packages("MuMIn")  
library(MuMIn)  
install.packages("piecewiseSEM", dependencies=T)  
library(piecewiseSEM)
```

```
#####
```

```
###
```

```
### Fig. 2
```

```
###
```

```
### Moving correlation analyses relating mean increasers (example shown below) and  
decreasers
```

```
### chronologies to monthly sea-ice extent (SIE) for the Arctic Ocean
```

```
B<-dcc(ALL_CRN_dRCS_NEG.crn[93:121,], SIE_dcc[1:29,], selection=-6:8,  
method="correlation", dynamic = "moving", win_size=20,  
win_offset=1, ci=0.05,var_names="SIE",boot="std")
```

```
plot(B)
```

```
# variables used:
```

```
# ALL_CRN_dRCS_NEG.crn = mean responder-type chronology for increasers (arithmetic mean  
computed for 13 individual detrended (dRCS) chronologies, all increasers)
```

```
# SIE_dcc = Pan-Arctic sea ice extent (SIE) in monthly resolution (from January to  
December)
```

```
#####
```

```
###
```

```
### Fig. 5A, 5B & Table S10 and Table S11
```

```
###
```

```
### Piecewise structure equation models (SEM) for each responder group (example for  
decreasers shown)
```

```
### A random intercept for a site (ID.s) was included in each linear mixed-effect (LME)  
model
```

```
psem_POSb <- psem(  
  lme(MRW_dRCS~LRD50_Z + TEMP_JJA_Z + SPEI_JJA, random=list(ID.s=~1), data =  
MYDATA_POS_CRN_ar, na.action = na.omit),  
  lme(SPEI_JJA~LRD50_Z + PRECIP_Z_JJA + TEMP_JJA_Z, random=list(ID.s=~1), data =  
MYDATA_POS_CRN_ar, na.action = na.omit),  
  lme(PRECIP_Z_JJA~LRD50_Z + TEMP_JJA_Z, random=list(ID.s=~1), data =
```

```

MYDATA_POS_CRN_ar, na.action = na.omit),
  lme(TEMP_JJA_Z~LRD50_Z, random=list(ID.s=~1), data = MYDATA_POS_CRN_ar, na.action =
na.omit)
)

POS_LRD50_Z <- summary(psem_POSb)
AIC(psem_POSb, aicc=TRUE)

# variables used:
# MRW_dRCS = mean ring width after dRCS detrending for each species-by-site chronology
# LRD50_Z = last retreat day of sea ice at the 50% of sea ice concentration threshold
(z-score)
# TEMP_JJA_Z = June-July-August mean temperature (z-score)
# SPEI_JJA = June-July-August mean standardized precipitation evaporation index
# PRECIP_Z_JJA = June-July-August precipitation sum (z-score)
# ID.s = species-by-site distinction
# MYDATA_POS_CRN_ar = data frame with all detrended mean annual growth records for 9
decreasers chronologies and standardized sea ice and climate variables

#####
###
### Table S12.
###
### linear mixed-effect (LME) models for increasers (as an example shown).
### A random intercept for a shrub (Shrub) nested within a site (Site.G) was included in
each model

m3_pSON_pA<-lme(RWIsq~pSON_pA, random=list(~1|Site.G, ~1|Shrub), data = MYDATA_NEG_aS,
method="ML",
                                cor=corAR1(), control=list(maxIter=1000),na.action = na.exclude)
summary(m3_pSON_pA)
r.squaredGLMM(m3_pSON_pA)

## null model:
m3_mNULL<-lme(RWIsq~1, random=list(~1|Site.G, ~1|Shrub), data = MYDATA_NEG_aS,
method="ML",
                                cor=corAR1(), control=list(maxIter=1000),na.action = na.exclude)
summary(m3_mNULL)
r.squaredGLMM(m3_mNULL)

### DIAGNOSTIC PLOTS

plot(m3_pSON_pA)

# 1: to check normal distribution of random effects:
plot(ranef(m3_pSON_pA, level=1)) # check level=1 and level=3 for each random effect

# 2: to check homogeneity of variance:
plot(fitted(m3_pSON_pA), residuals(m3_pSON_pA), xlab = "Fitted Values", ylab =
"Residuals")
abline(h = 0, lty = 2)
lines(smooth.spline(fitted(m3_pSON_pA), residuals(m3_pSON_pA)))

# 3: to check if residuals of the model are normally distributed:

```

```

require("lattice")

qqnorm(resid(m3_pSON_pA))
qqline(resid(m3_pSON_pA), col="red", lty=2, lwd=2)

hist(resid(m3_pSON_pA))
d<-density(resid(m3_pSON_pA), na.rm = TRUE)
plot(d)

hist(resid(m3_pSON_pA))
hist(resid(m3_pSON_pA), breaks=100)

mean(resid(m3_pSON_pA))

# 4: checking for linearity
Plot.Model.F.Linearity<-plot(resid(m3_pSON_pA),MYDATA_NEG_aS_ar$RWIsq)

# variables used:
# RWIsq = all shrubs mean ring width index (RWI) after dRCS detrending and square root
transformation
# pSON_pA = previous September-October-November mean Pan-Arctic sea-ice extent (z-score)
# MYDATA_NEG_aS = data frame with all detrended mean annual growth records for all
shrubs assigned to increasers with sea ice variables

#####
###
### Table S13.
###
### linear mixed-effect (LME) models for each species-by-site chronology (Site.G) run
for each sea ice variable
### (here for Pan-Arctic autumn (from pervious September to previous November) sea ice
extent as an example).
### A random intercept for a year was included in each model

MYDATA_DD_aS<-as.data.frame(MYDATA_DD_aS)

colnames(MYDATA_DD_aS)

# order by alphabetic:

MYDATA_DD_aS<-with(MYDATA_DD_aS,MYDATA_DD_aS[order(Site.G) , ])

head(MYDATA_DD_aS)
tail(MYDATA_DD_aS)

GROUPS <- unique(MYDATA_DD_aS$Site.G)

for (i in 1:length(GROUPS)){
  CURRENT_GROUP <- GROUPS[i]

  df <- filter(MYDATA_DD_aS, Site.G == CURRENT_GROUP) # subset the dataframe
  fit <- lme(RWIsq~pSON_pA, random= ~1|YEAR, data = df, method="ML", cor=corAR1(),
control=list(maxIter=1000),na.action = na.exclude)
  print(summary(fit)$tTable)
  #print(summary(fit)$AIC)
}

```

```

    #print(r.squaredGLMM(fit))
    #print(AICc(fit))
  }

#str(summary(fit))

## NULL model:  # random=~1|YEAR

GROUPS <- unique(MYDATA_DD_aS$Site.G)

for (i in 1:length(GROUPS)){
  CURRENT_GROUP <- GROUPS[i]

  df <- filter(MYDATA_DD_aS, Site.G == CURRENT_GROUP)  # subset the dataframe
  fit <- lme(RWIsq~1, random= ~1|YEAR, data = df, method="ML", cor=corAR1(),
control=list(maxIter=1000),na.action = na.exclude)
  #print(summary(fit)$tTable)
  AIC_null<-print(summary(fit)$AIC)
}

# variables used:
# RWIsq = all shrubs mean ring width index (RWI) after dRCS detrending and square root
transformation
# pSON_pA = previous September-October-November mean Pan-Arctic sea-ice extent (z-score)
# MYDATA_DD_aS = data frame with all detrended mean annual growth records for all shrubs
and standardized climate variables

#####
###
### Table S14.
###
### linear mixed-effect (LME) models for increasers (as an example) and Pan-Arctic pSON
SIE
### and double detrended series (both RWI for each shrub and sea ice-related
### predictors time-series). A random intercept for a site (Site.G) was included in each
model.

m3_pSON_pA<-lme(RWIar~pSON_pA_DD, random=list(~1|Site.G), data = MYDATA_NEG_aS_ar,
method="ML",
cor=corAR1(), control=list(maxIter=1000),na.action = na.exclude)
summary(m3_pSON_pA)
intervals(m3_pSON_pA, which="fixed", level = 0.95)
r.squaredGLMM(m3_pSON_pA)

# variables used:
# RWIar = detrended shrub growth (for each individual shrub) after first dRCS and then
AR detrending
# pSON_pA_DD = Pan-Arctic autumn (i.e., from previous September to previous November)
sea ice extent after AR detrending
# MYDATA_NEG_aS_ar = data frame with all double detrended mean annual growth records for
all shrubs and detrended sea ice variables

```

```
#####
###
### example for climate data standardization (z-score) at a site level:

TEMP_JJA_Z<-scale(TEMP_JJA[,-1],center=T)

# variables used:
# TEMP_JJA = raw June-July-August mean temperature for particular site for the common
period (1979-2008)
# TEMP_JJA_Z = standardized June-July-August mean temperature for particular site

#####
###
### example for AR detrending for regional sea ice extent:

REG_SIEw_AR<-detrend(REG_SIE_window_RWL,make.plot=TRUE, method="Ar")

# variables used:
# REG_SIE_window_RWL = rwl file for regional sea ice variables in seasonal resolution
for each site for the common period (1979-2008)
# REG_SIEw_AR = object with detrended (Ar) regional sea ice variables in seasonal
resolution for each site
```
